# Supplementary material for: Copper(ii) complexes of sterically hindered phenolic Schiff bases: synthesis, characterization, interaction with biomolecules, and antioxidant and antimicrobial activity
Source: Royal Society of Chemistry journal article supplement (doi:10.1039/d4nj00430b), 2024-01-01
Supplement: d4nj00430b1.pdf [file d4nj00430b1.pdf]

## Supporting Information

### Table of Contents

|                                  |    |
|----------------------------------|----|
| <sup>1</sup> H NMR spectra ..... | 2  |
| FT-IR spectra.....               | 4  |
| UV-vis spectra .....             | 6  |
| X-Ray diffractograms .....       | 8  |
| ESR spectra .....                | 9  |
| TG and DSC curves .....          | 11 |
| ESI-MS spectra.....              | 14 |
| Electrochemistry .....           | 15 |
| Protein binding studies .....    | 16 |
| Albumin binding studies .....    | 17 |
| Hemoglobin binding studies.....  | 19 |
| DFT calculations.....            | 21 |
| Molecular docking studies.....   | 28 |
| References .....                 | 34 |

# <sup>1</sup>H NMR spectra

6,6'-((1*E*,1'*E*)-(ethane-1,2-diylbis(azaneylylidene))bis(methaneylylidene))bis(3,5-di-*tert*-butylbenzene-1,2-diol) (**1**)

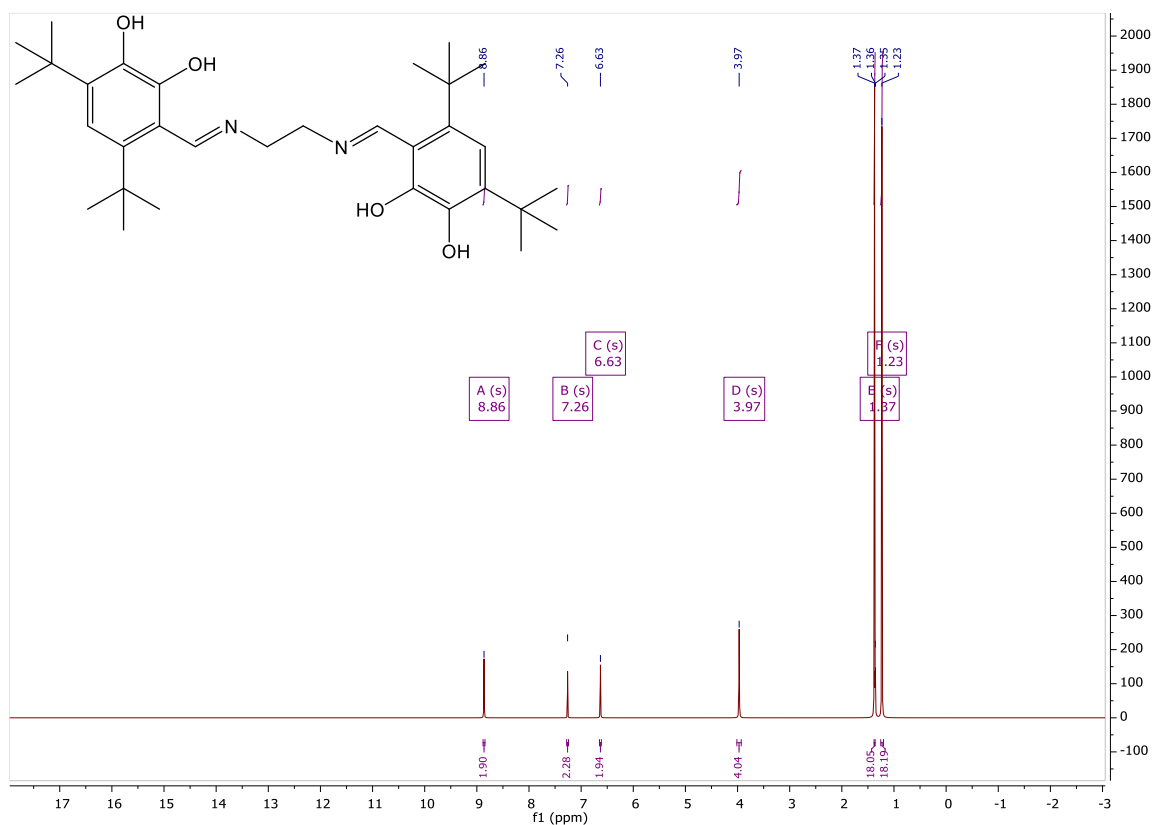

6,6'-((1*E*,1'*E*)-(propane-1,3-diylbis(azaneylylidene))bis(methaneylylidene))bis(3,5-di-*tert*-butylbenzene-1,2-diol) (**2**)

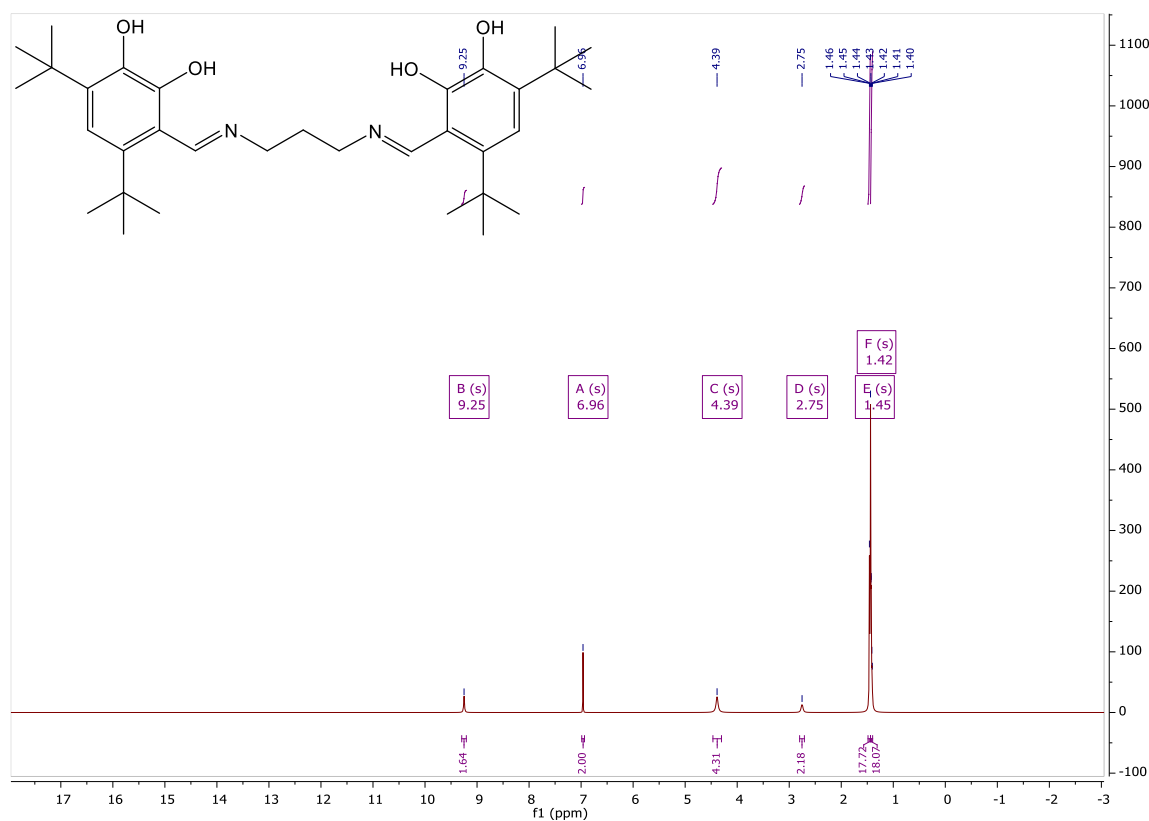

4,6-di-*tert*-butyl-3-((pyridin-4-ylimino)methyl)benzene-1,2-diol (**3**)

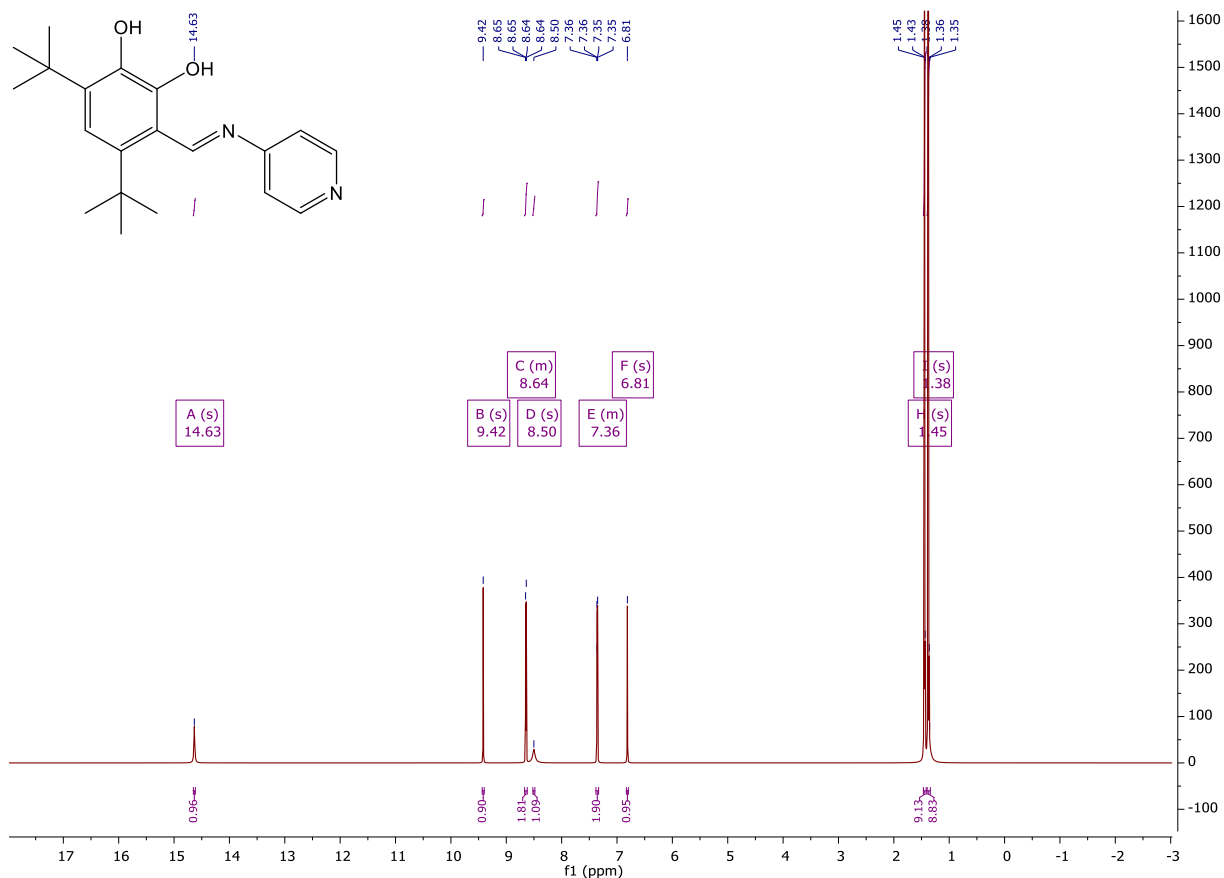

4-((4,6-di-tert-butyl-2,3-dihydroxybenzylidene)amino)benzenesulfonamide (5)

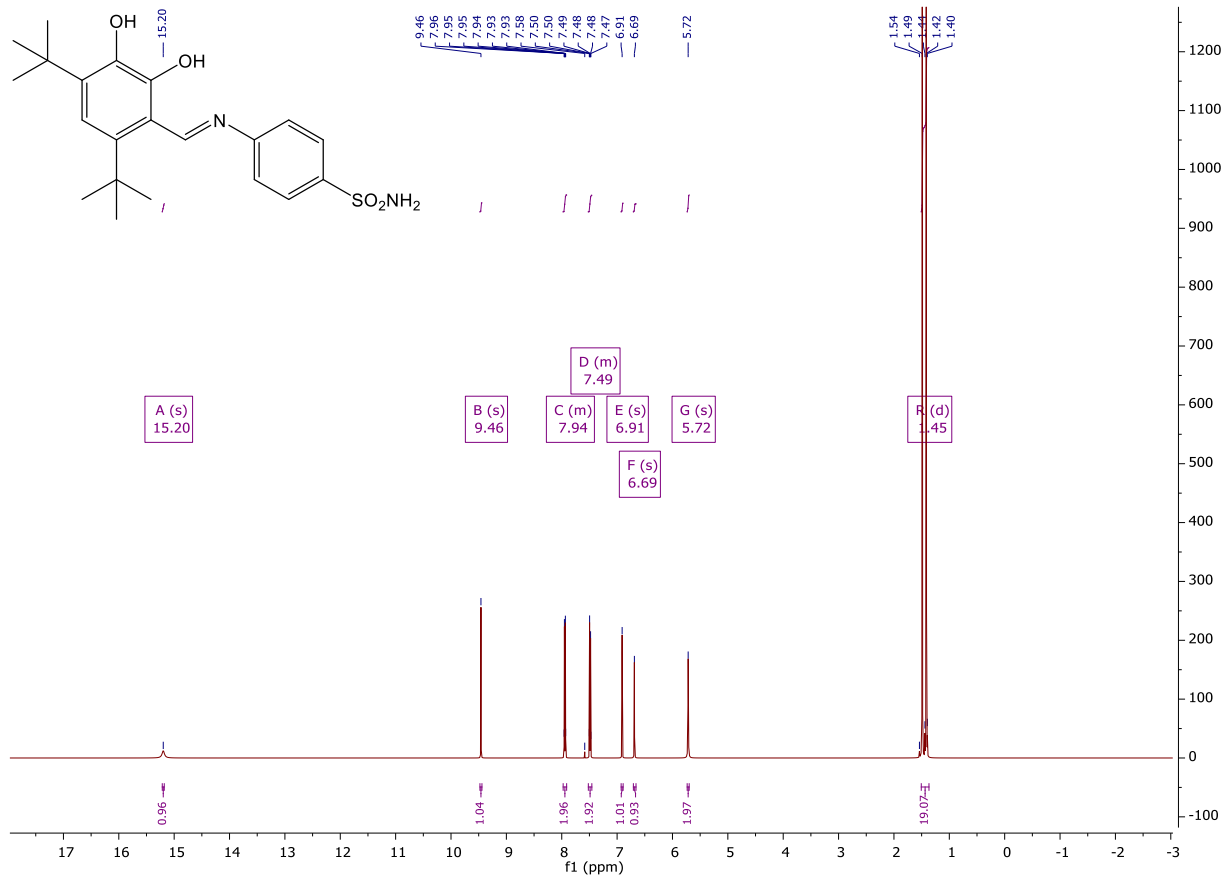

4,6-di-tert-butyl-3-(((4-hydroxyphenyl)imino)methyl)benzene-1,2-diol (6)

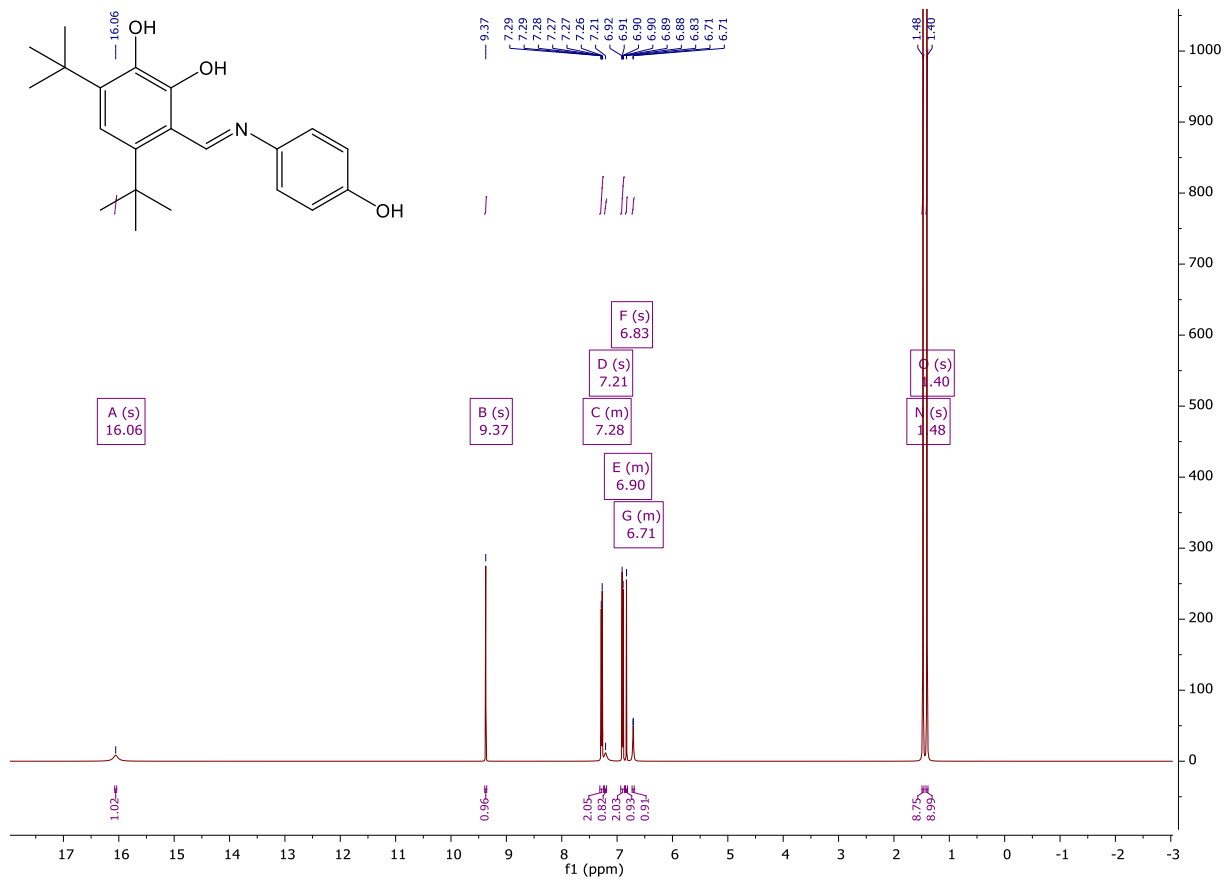

### FT-IR spectra

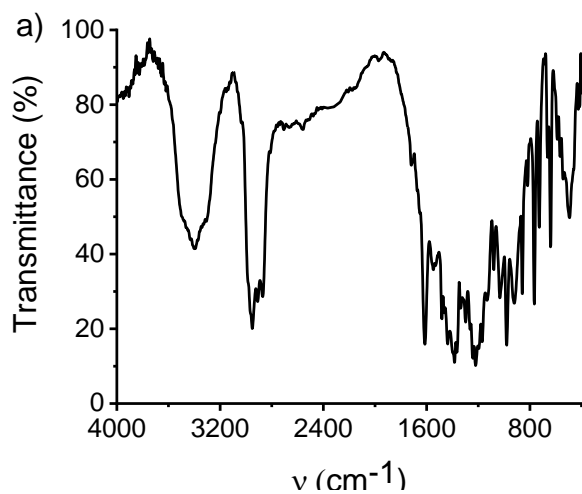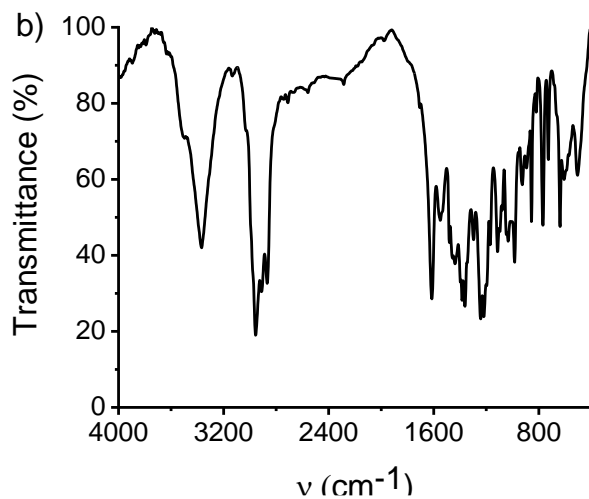

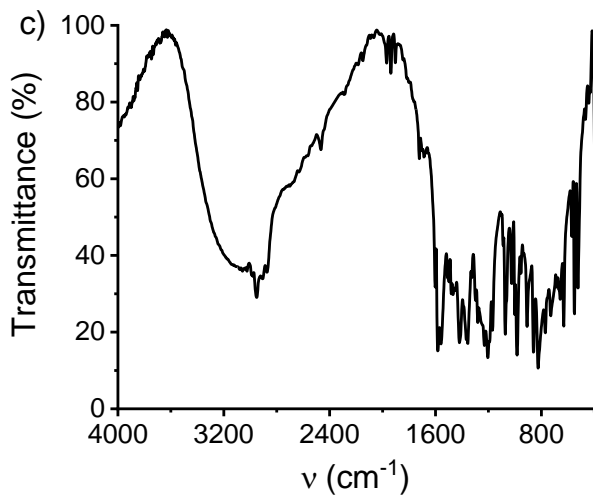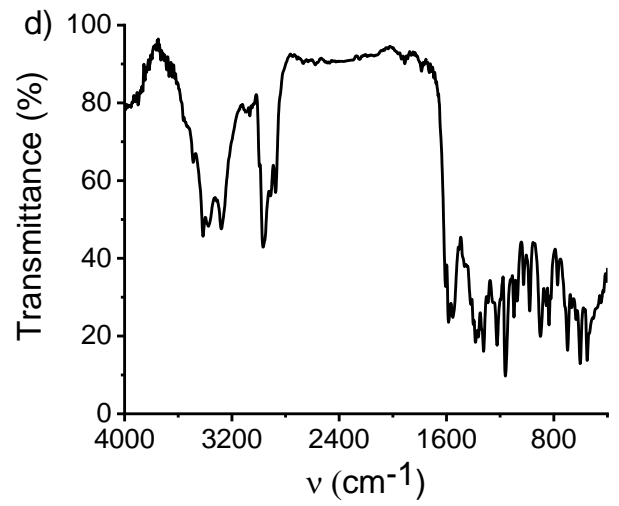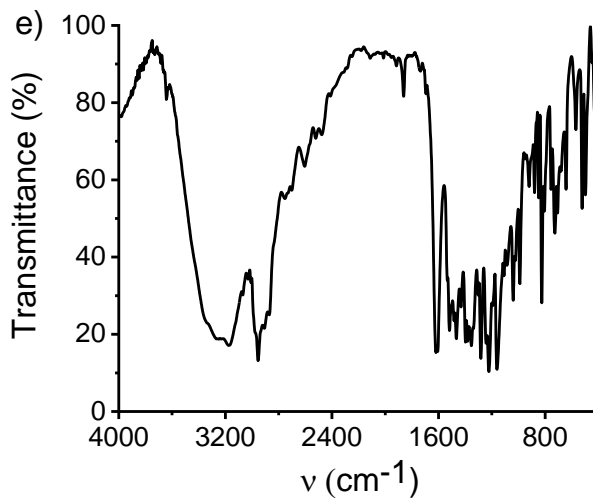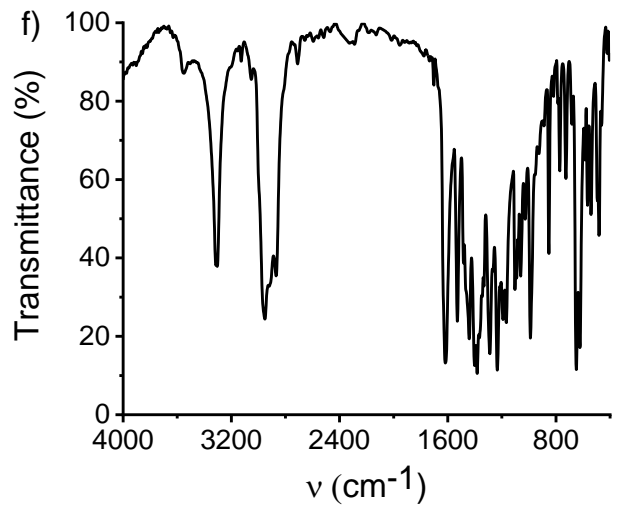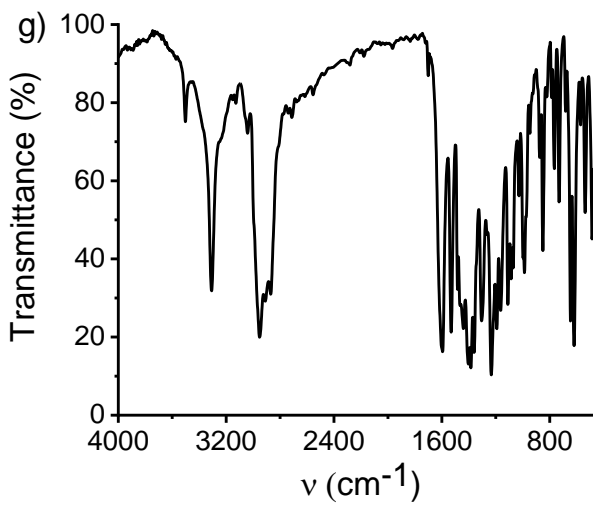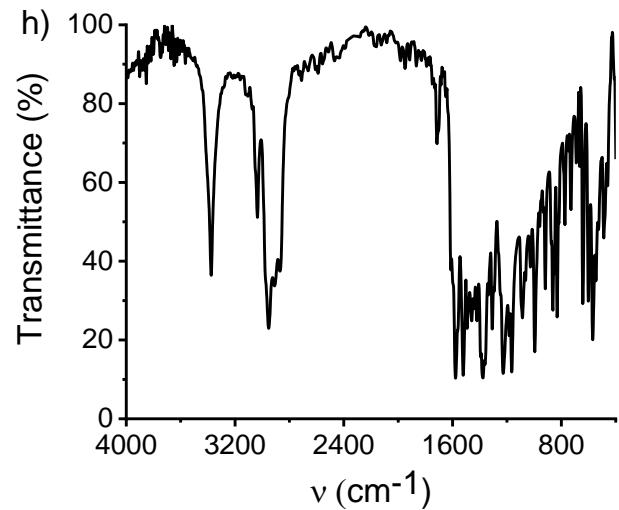

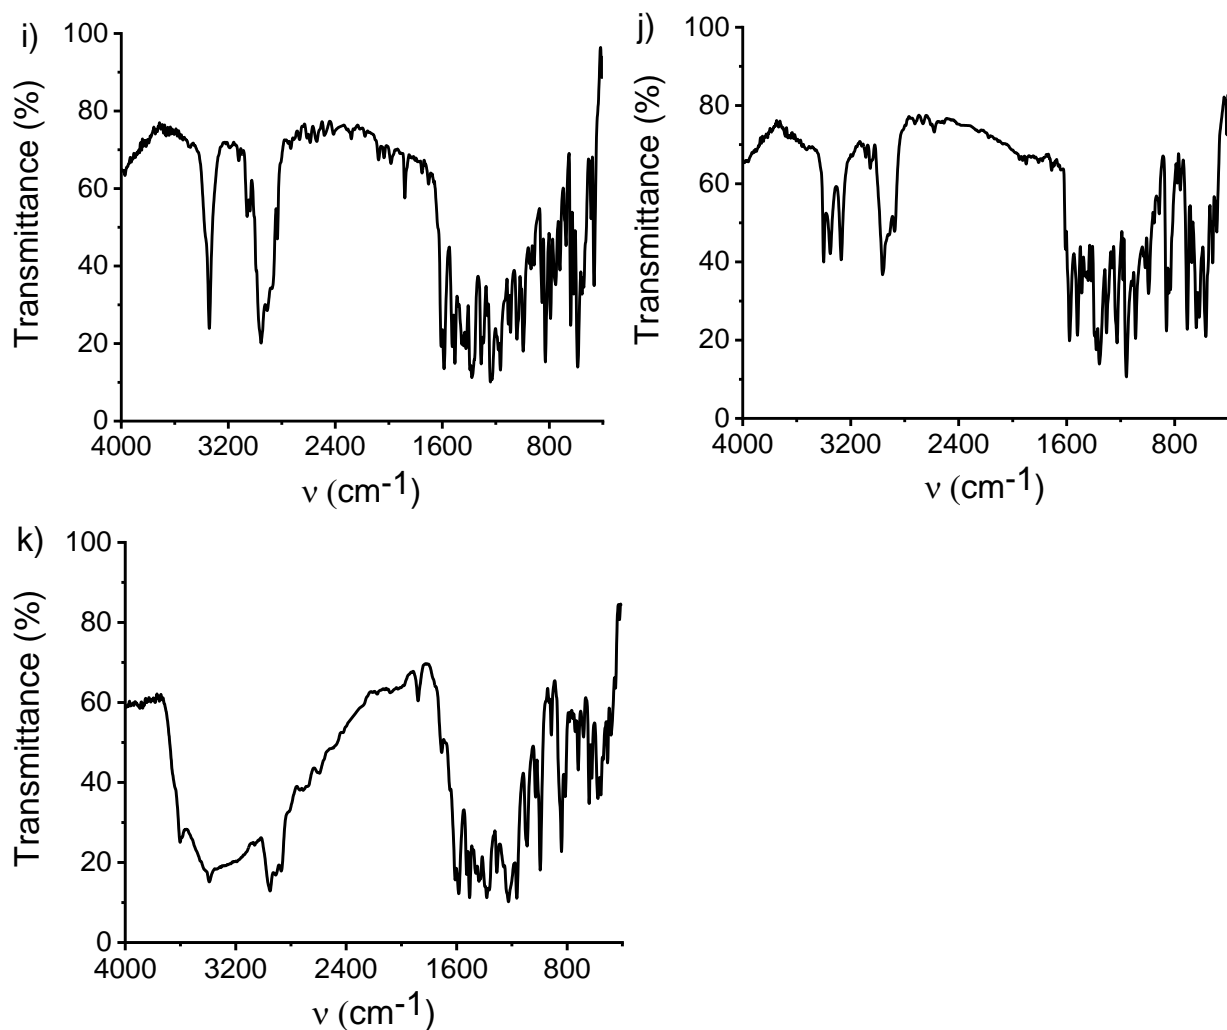

**Figure S1.** FT-IR spectra of the ligands **1** (a), **2** (b), **3** (c), **5** (d), **6** (e) and their Cu(II) complexes **1a** (f), **2a** (g), **3a** (h), **4a** (i), **5a** (j), **6a** (k). FT-IR spectrum of the ligand **4** is given in [1].

### UV-vis spectra

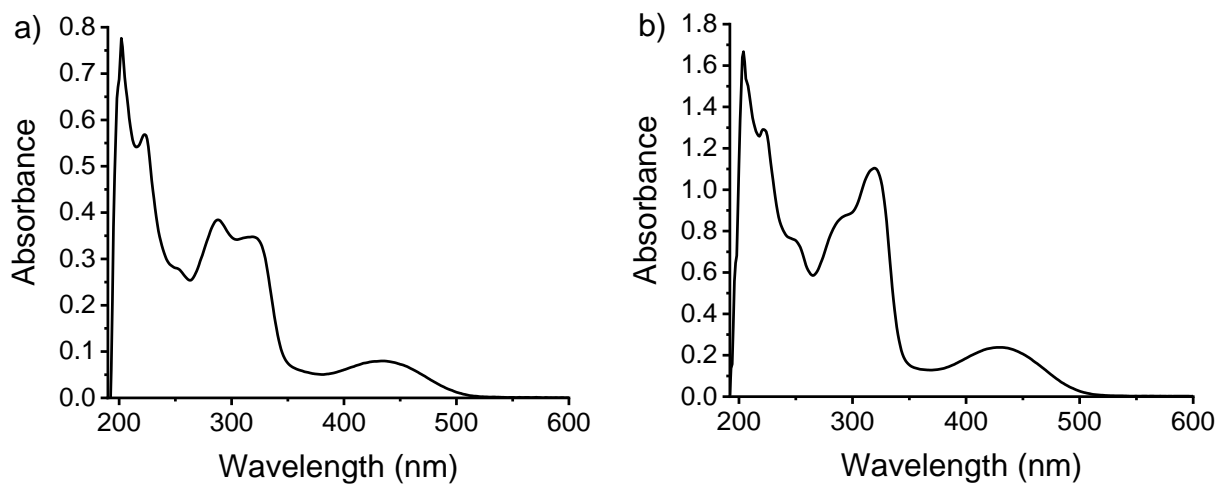

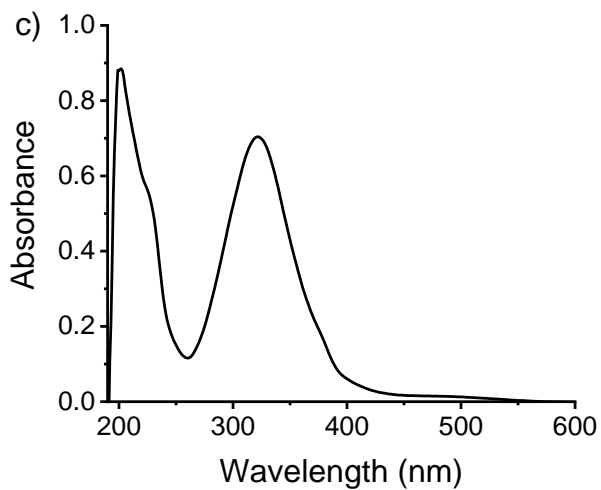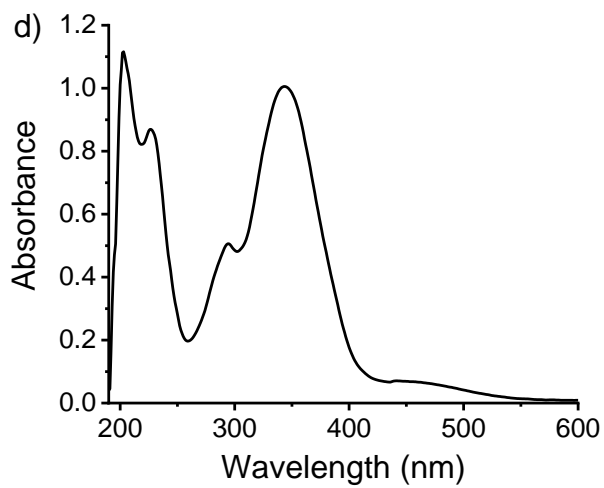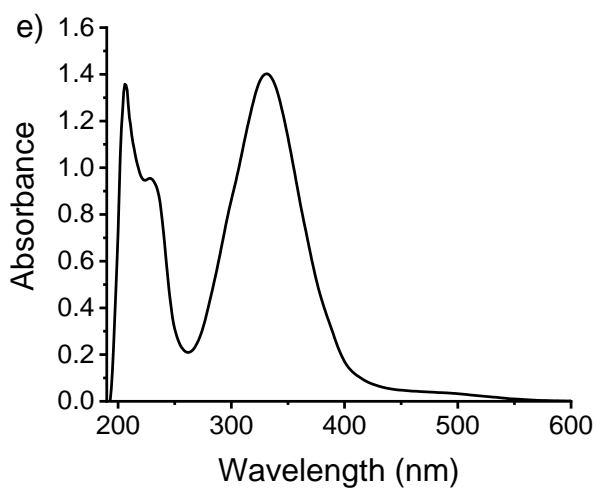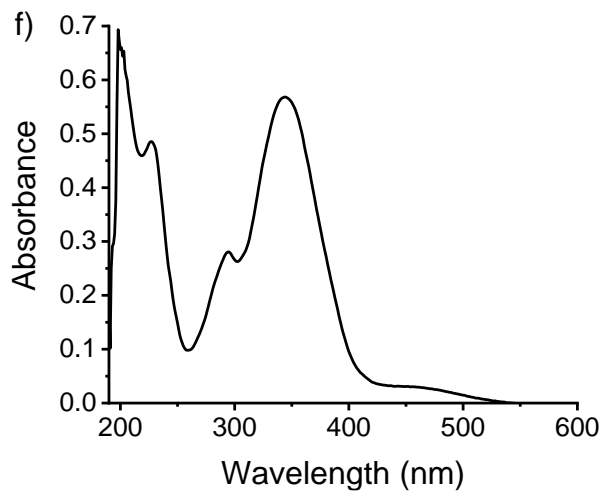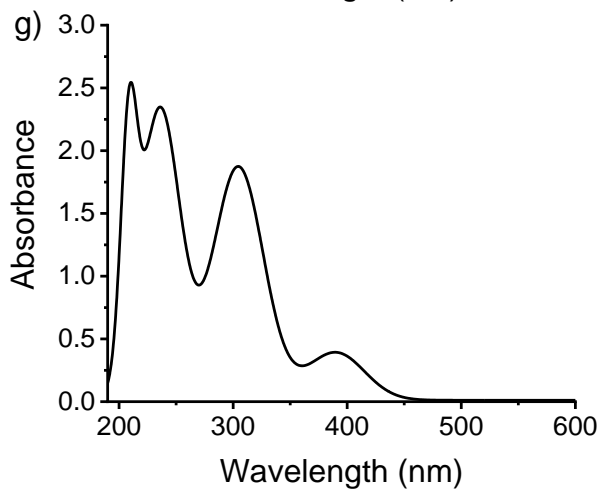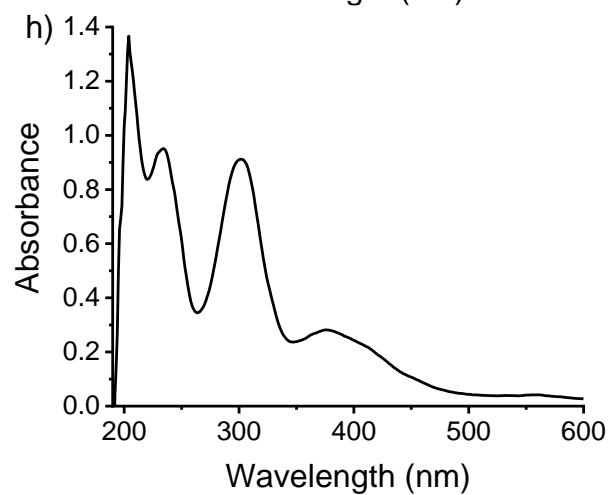

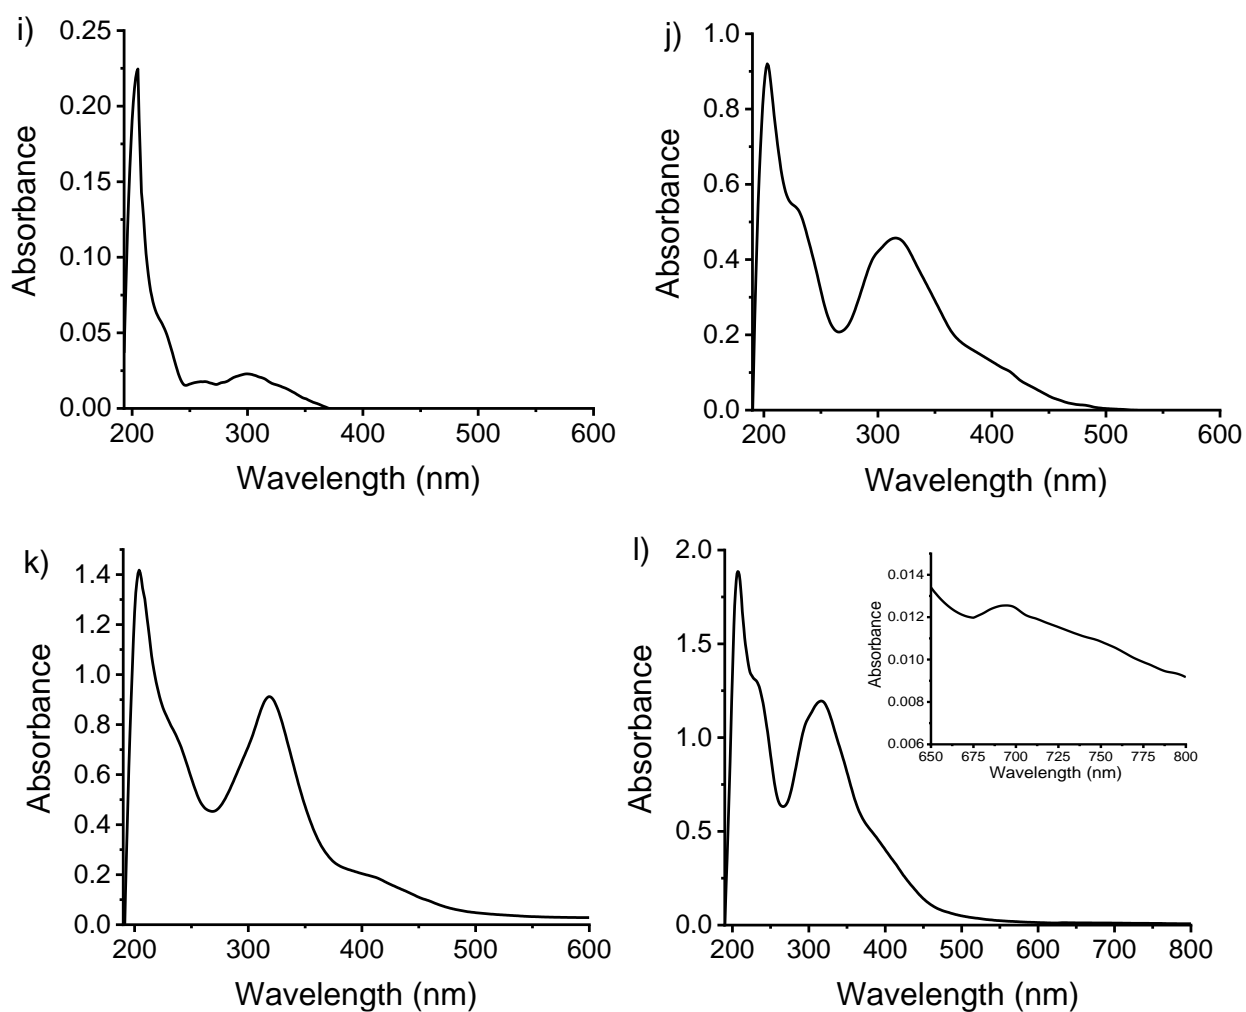

**Figure S2.** UV-Vis spectra of the ligands **1** (a; 85  $\mu$ M), **2** (b; 59  $\mu$ M), **3** (c; 74  $\mu$ M), **4** (d; 48  $\mu$ M), **5** (e; 91  $\mu$ M), **6** (f; 34  $\mu$ M) and their Cu(II) complexes **1a** (g; 81  $\mu$ M), **2a** (h; 64  $\mu$ M), **3a** (i; 122  $\mu$ M), **4a** (j; 41  $\mu$ M), **5a** (k; 23  $\mu$ M), **6a** (l; 53  $\mu$ M) in acetonitrile solutions.

### X-Ray diffractograms

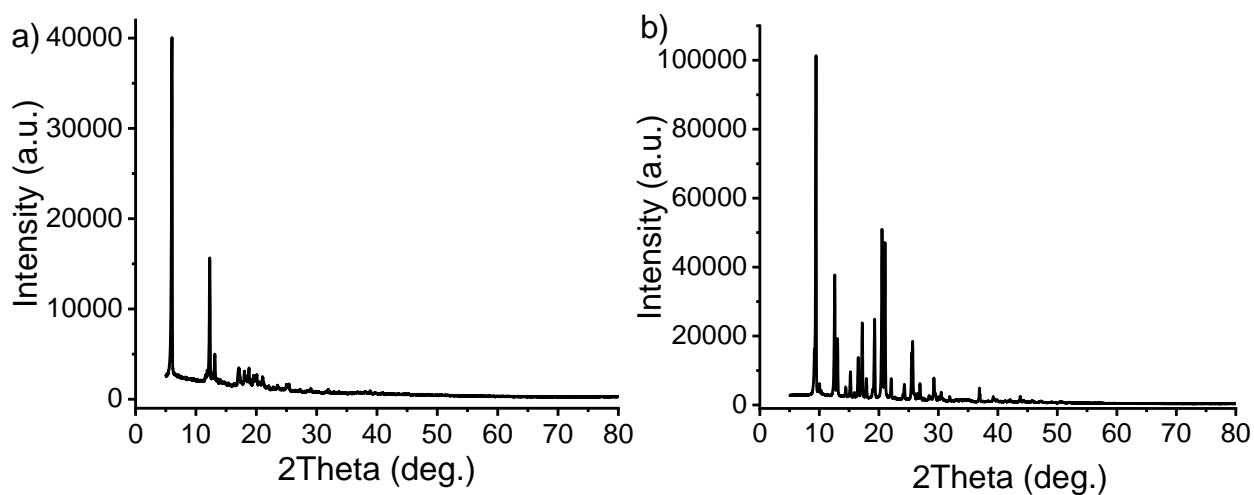



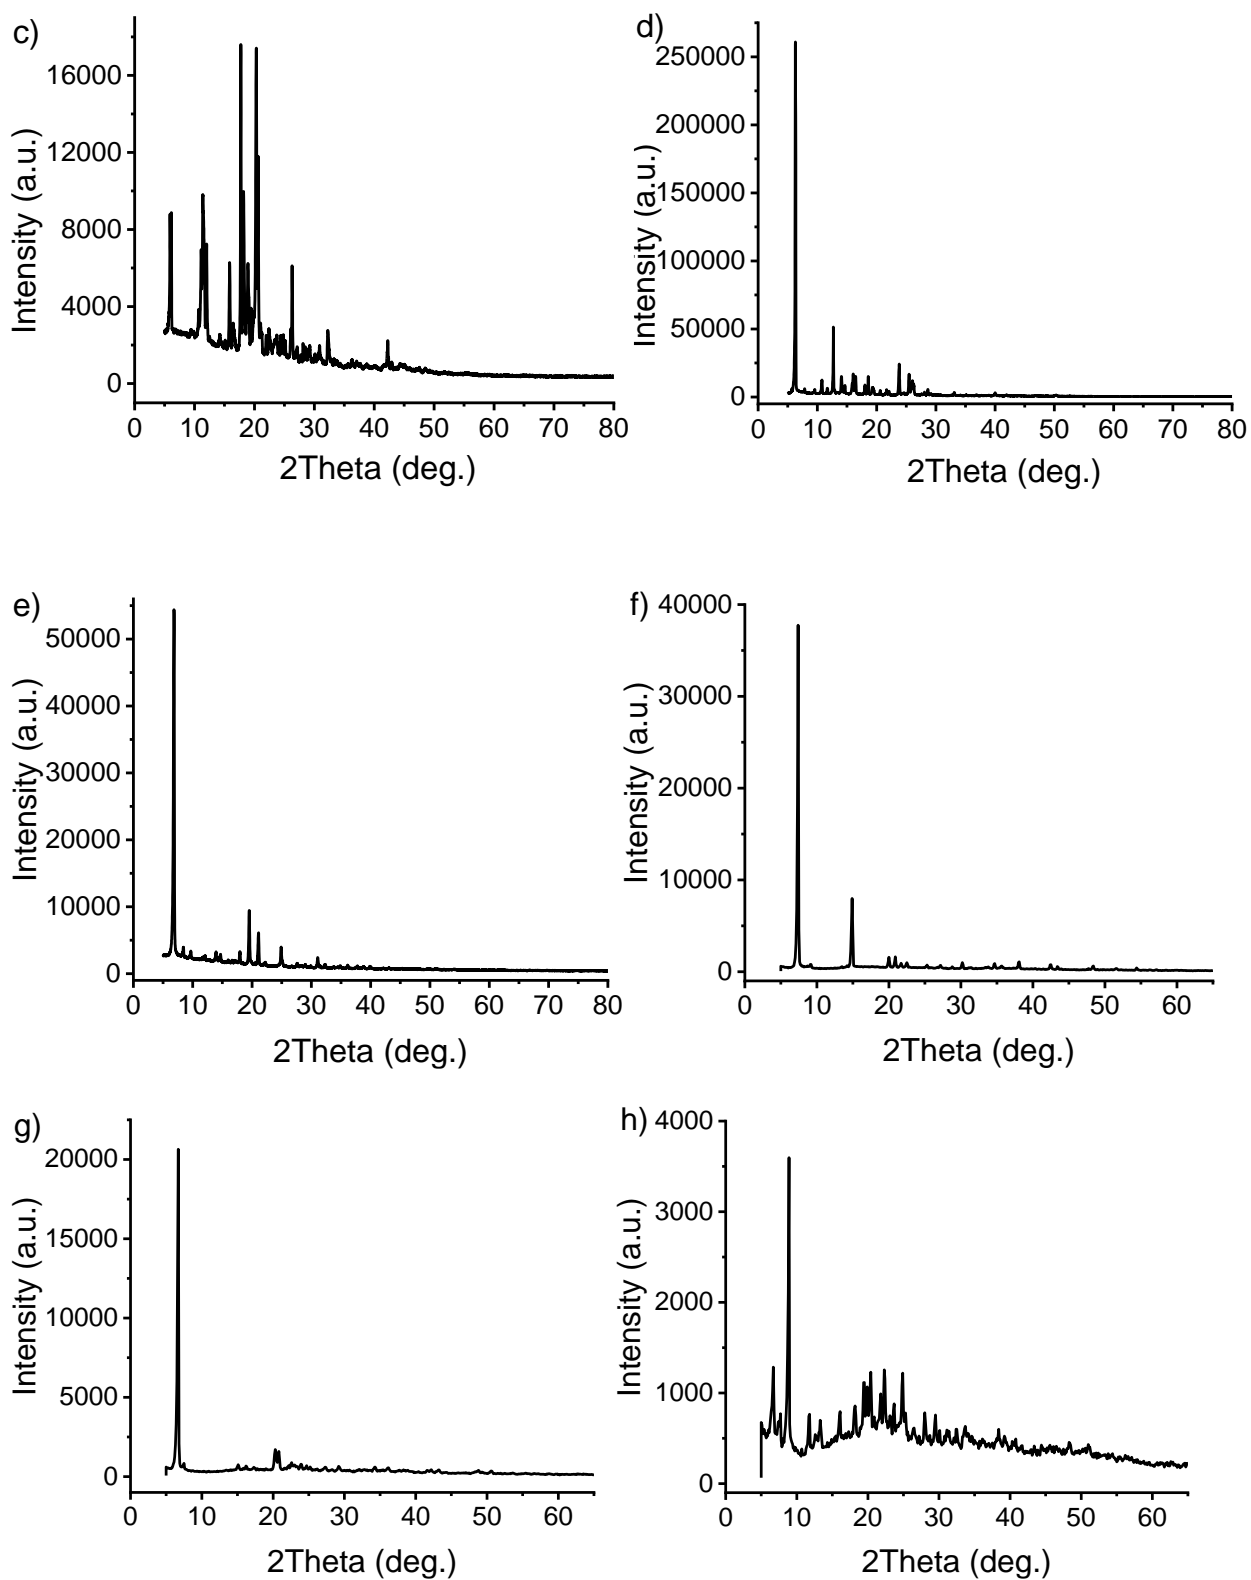

**Figure S3.** X-Ray diffractograms of the ligands **2** (a), **4** (b), **5** (c), **6** (d) and their Cu(II) complexes **2a** (e), **4a** (f), **5a** (g), **6a** (h).

ESR spectra

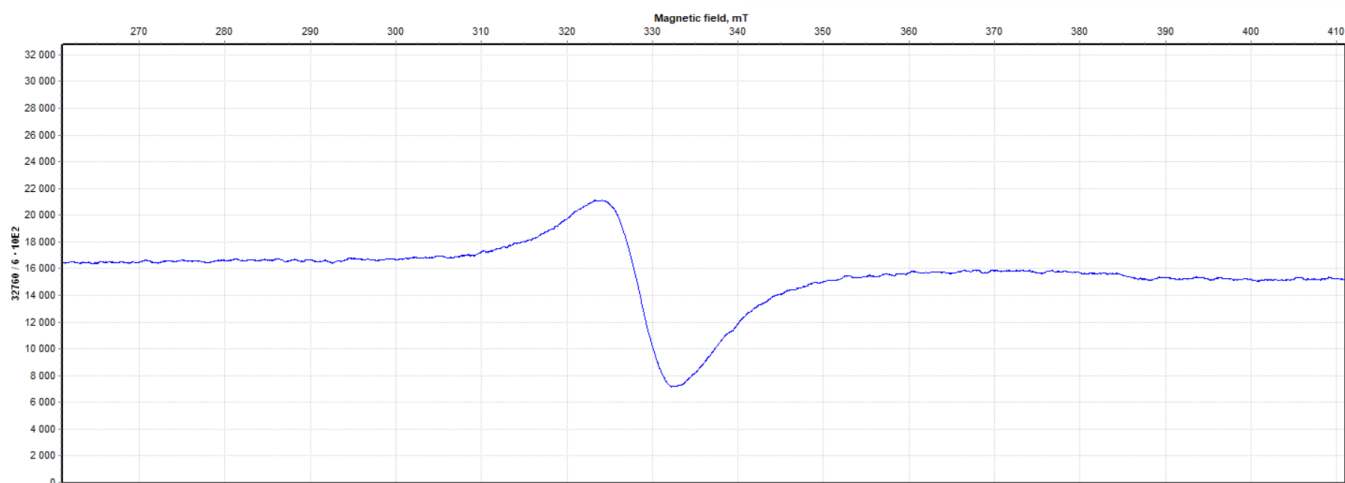

**Figure S4.** ESR spectrum of the Cu(II) complex **3a**.

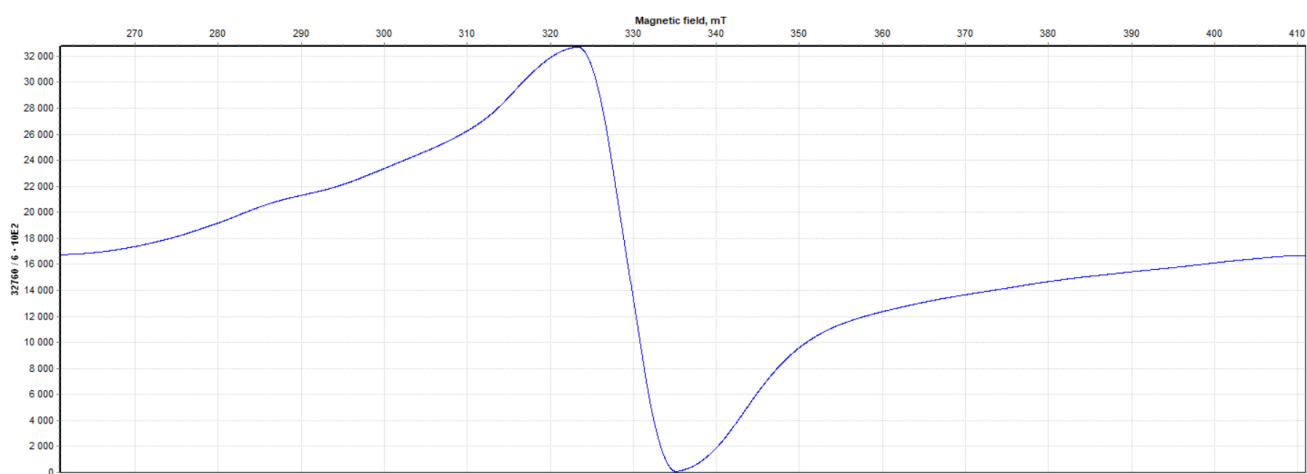

**Figure S5.** ESR spectrum of the Cu(II) complex **4a**.

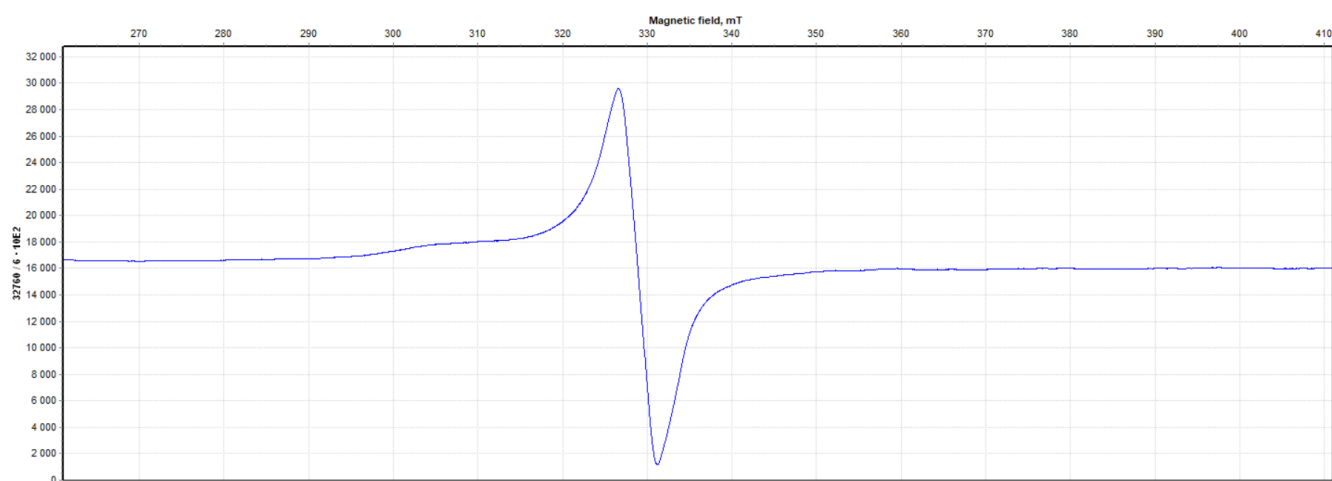

**Figure S6.** ESR spectrum of the Cu(II) complex **5a**.

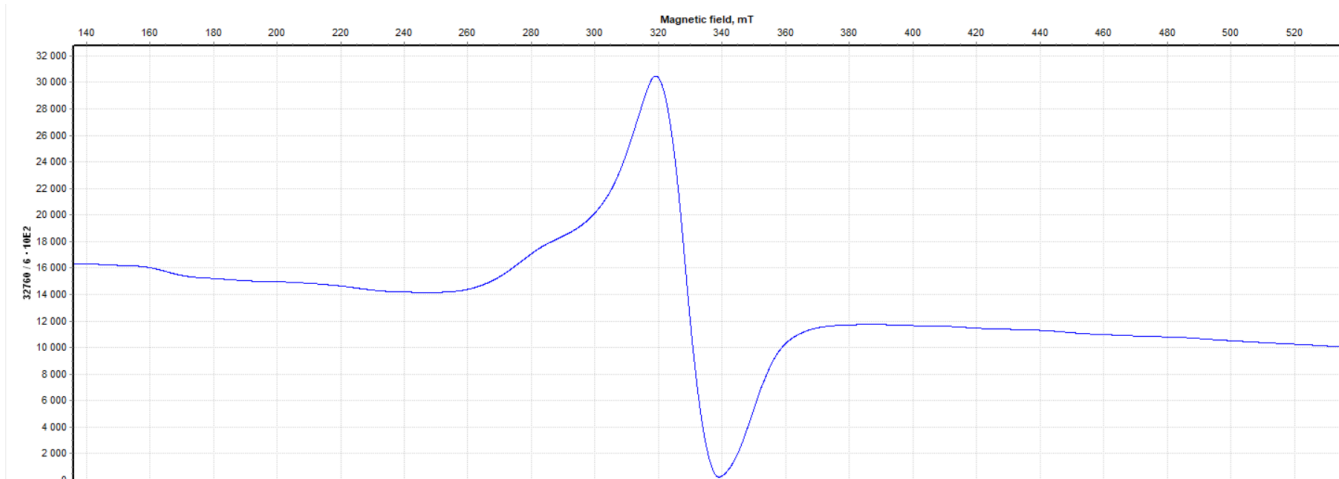

**Figure S7.** ESR spectrum of the Cu(II) complex **6a**.

TG and DSC curves

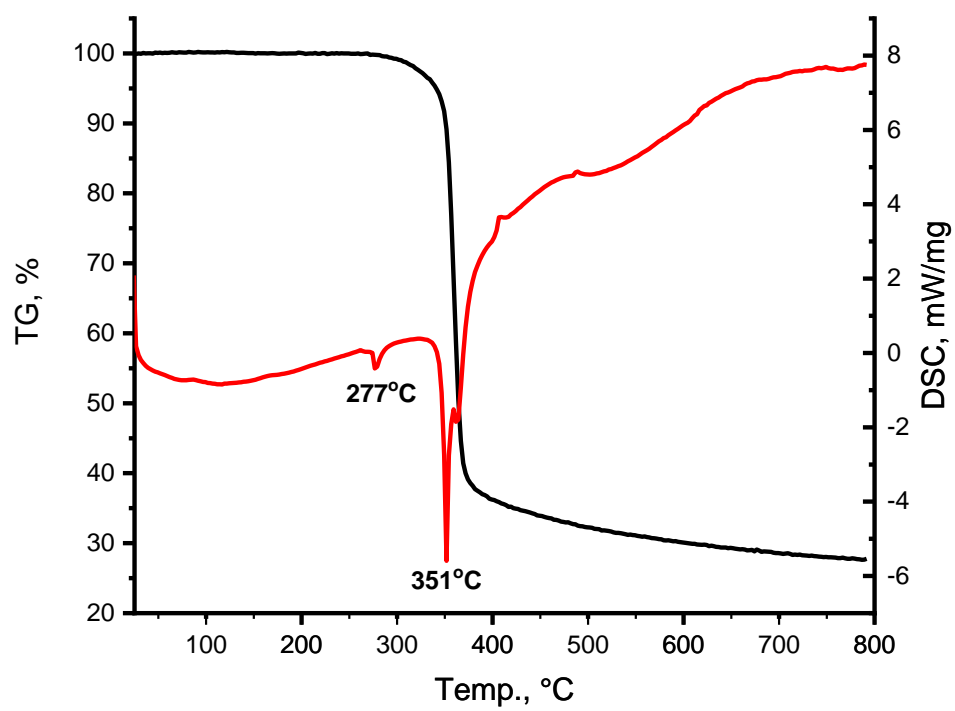

**Figure S8.** TG and DSC curves of the compound **1a**.

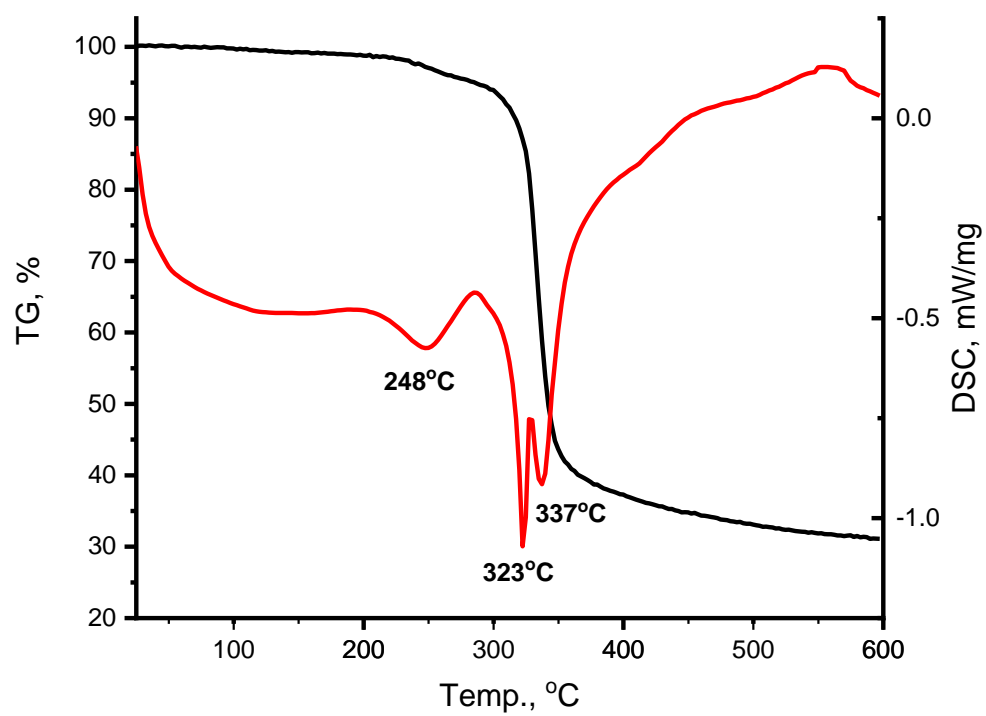

**Figure S9.** TG and DSC curves of the compound **2a**.

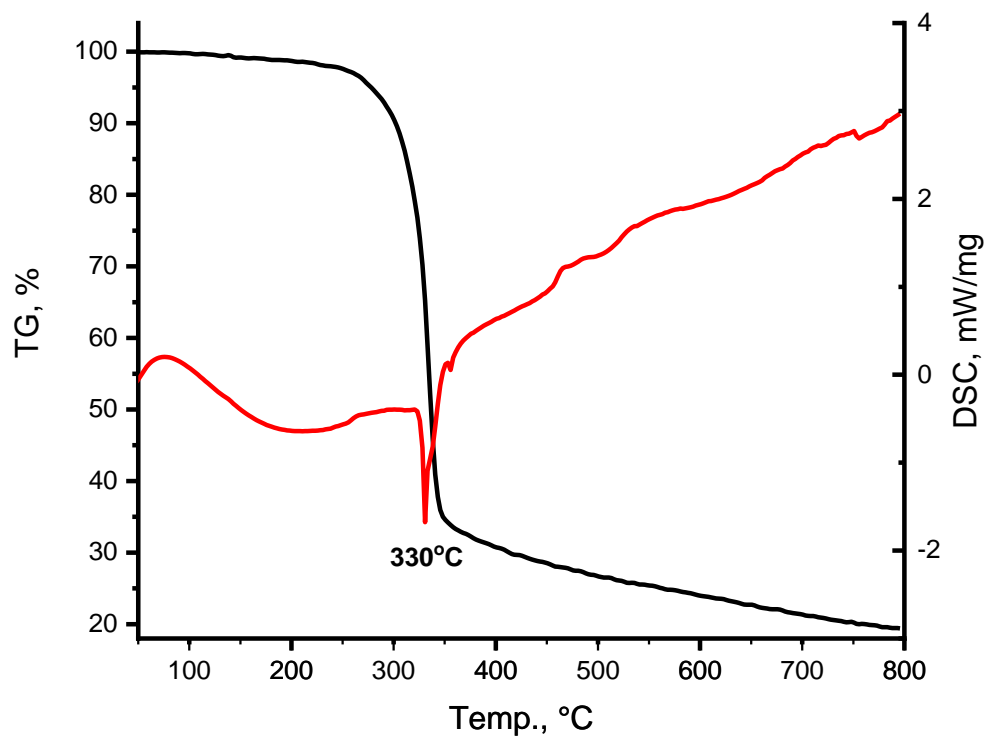

**Figure S10.** TG and DSC curves of the compound **3a**.

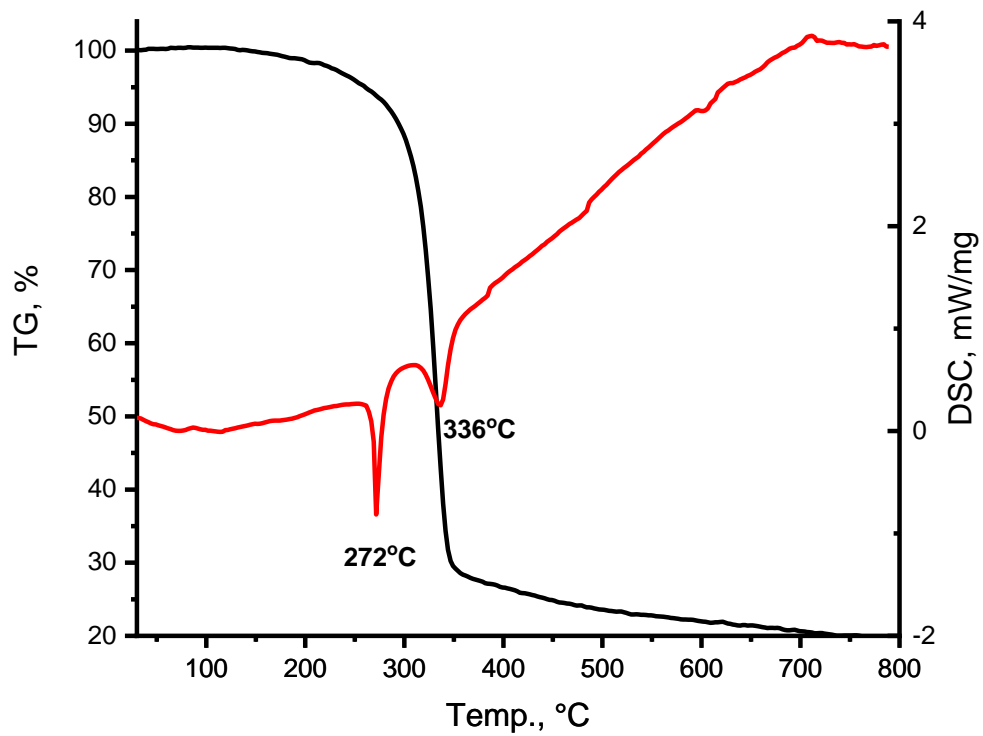

**Figure S11.** TG and DSC curves of the compound **4a**.

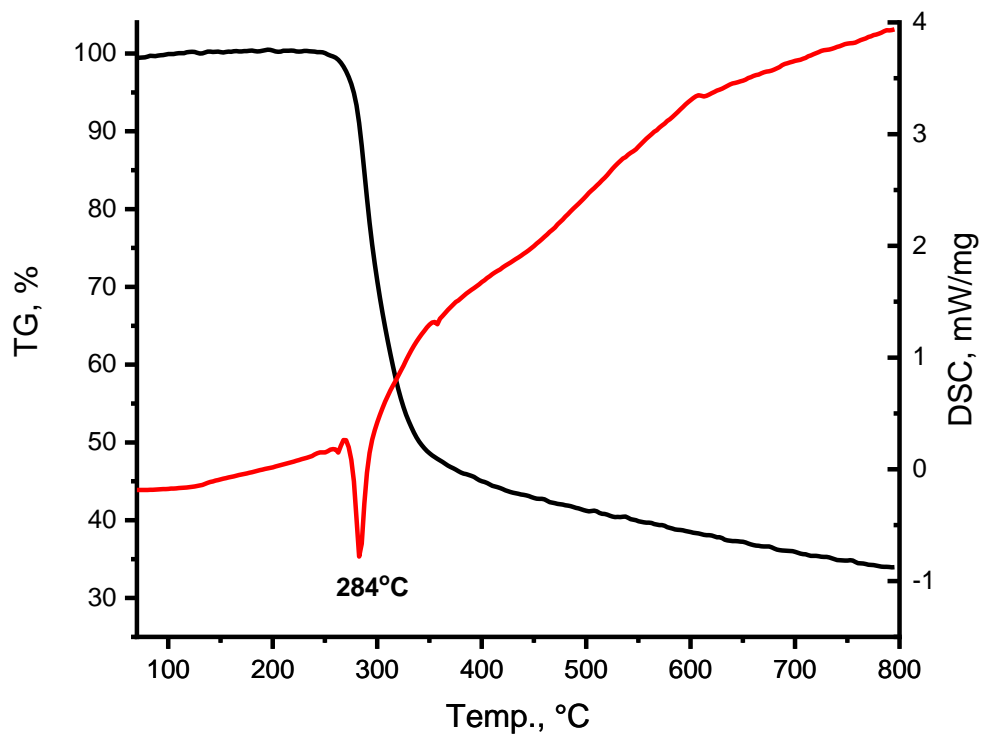

**Figure S12.** TG and DSC curves of the compound **5a**.

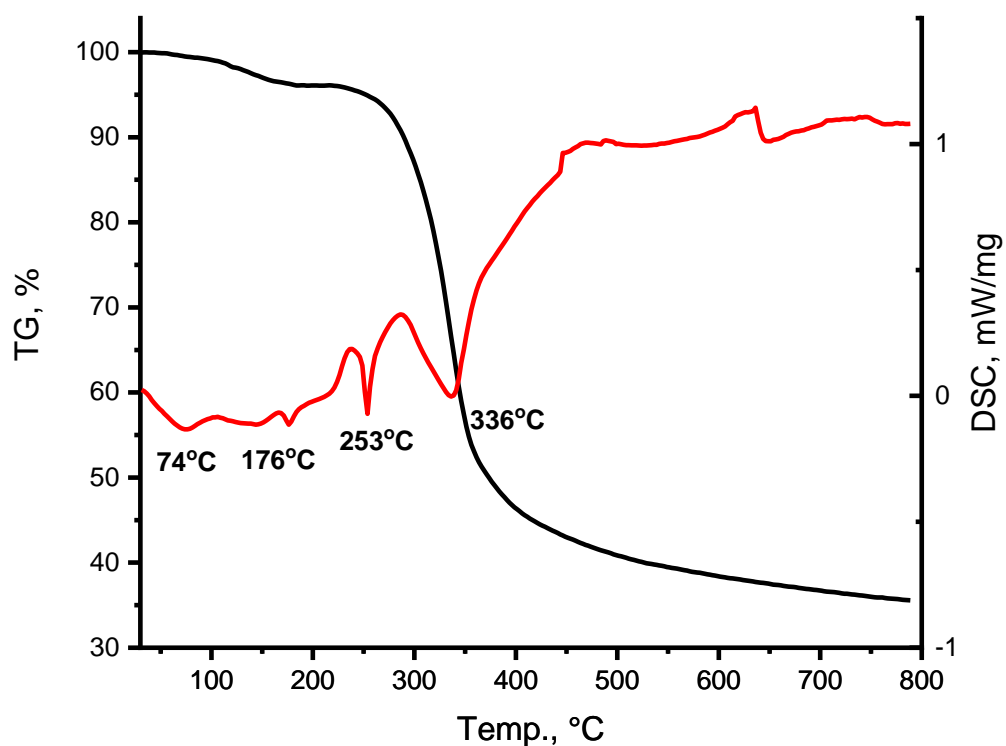

**Figure S13.** TG and DSC curves of the compound **6a**.

**Table S1.** Thermal properties of the compounds.

| sample    | Td <sup>a</sup> , °C | Mass after destruction, % | Energy of thermal destruction, J/g |
|-----------|----------------------|---------------------------|------------------------------------|
| <b>1a</b> | 335                  | 28                        | -150.9                             |
| <b>2a</b> | 285                  | 31                        | -137.0                             |
| <b>3a</b> | 280                  | 19                        | -104.6                             |
| <b>4a</b> | 258                  | 21                        | -90.0                              |
| <b>5a</b> | 277                  | 36                        | -119.0                             |
| <b>6a</b> | 299 <sup>b</sup>     | 34                        | -140.3                             |

<sup>a</sup> Temperatures of destruction (Td) were calculated as 5% weight loss.

<sup>b</sup> Due to the presence of solvent in the complex, the destruction temperature (Td) was calculated according to the instrument software.

## ESI-MS spectra

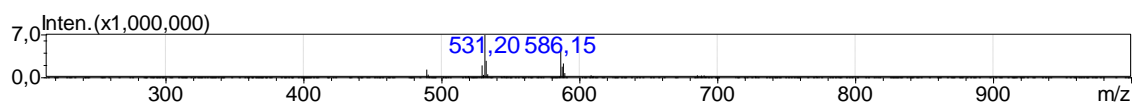

**Figure S14.** ESI-MS(+) spectrum of the Cu(II) complex **1a**.

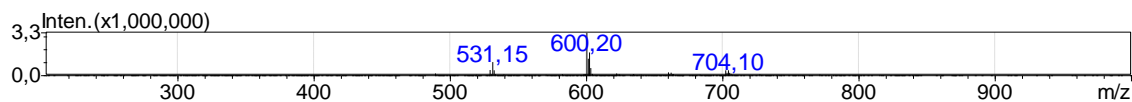

**Figure S15.** ESI-MS(+) spectrum of the Cu(II) complex **2a**.

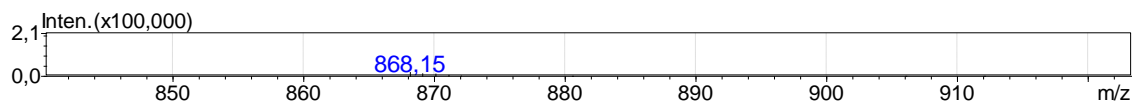

**Figure S16.** ESI-MS(-) spectrum of the Cu(II) complex **5a**.

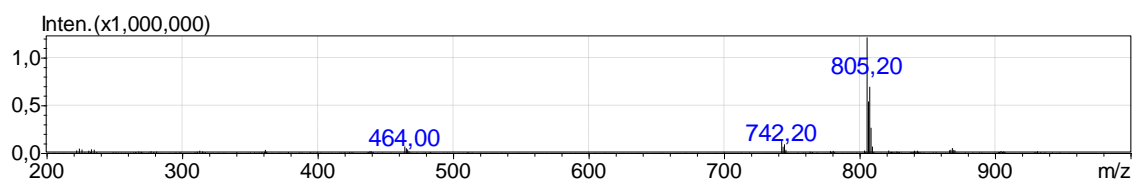

**Figure S17.** ESI-MS(-) spectrum of the Cu(II) complex **6a**.

## Electrochemistry

**Table S2.** Cyclic voltammetry data (anodic, cathodic scan,  $50 \text{ mV} \cdot \text{s}^{-1}$ ) for the ligands and their Cu(II) complexes.

| Compound  | Anodic scan, $E_{pa}$ , V |      |      |      |      | Cathodic scan, $E_{pc}$ , V |       |       |
|-----------|---------------------------|------|------|------|------|-----------------------------|-------|-------|
| <b>1</b>  | 0.91                      | 1.12 | 1.40 | 1.63 | 2.06 | -1.78                       | ~-2.5 |       |
| <b>1a</b> | 0.91                      | 1.29 | 1.41 | 1.67 | 2.08 | -0.63                       | -1.11 |       |
| <b>2</b>  | 0.88                      | 1.63 | 2.03 |      |      | -1.80                       |       |       |
| <b>2a</b> | 0.96                      | 1.59 |      |      |      | -0.72                       | -1.1  |       |
| <b>3</b>  | 0.71                      | 1.17 | 1.83 |      |      |                             |       |       |
| <b>4</b>  | 0.82                      | 1.11 | 1.48 | 1.63 | 1.94 | -1.56                       |       |       |
| <b>4a</b> | 0.83                      | 1.37 | 1.60 | 1.89 |      | -0.75                       |       |       |
| <b>5</b>  | 0.94                      | 1.10 | 1.39 | 1.61 | 2.02 | -1.31                       | -1.92 | -2.23 |
| <b>5a</b> | 0.91                      | 1.03 | 1.39 | 1.57 | 2.01 | -1.42                       |       |       |
| <b>6</b>  | 0.81                      | 1.08 | 1.36 | 1.67 | 1.89 | -1.61                       | -1.83 |       |
| <b>6a</b> | 0.85                      |      | 1.35 | 1.66 | 1.91 | -0.65                       | -1.04 | -1.83 |

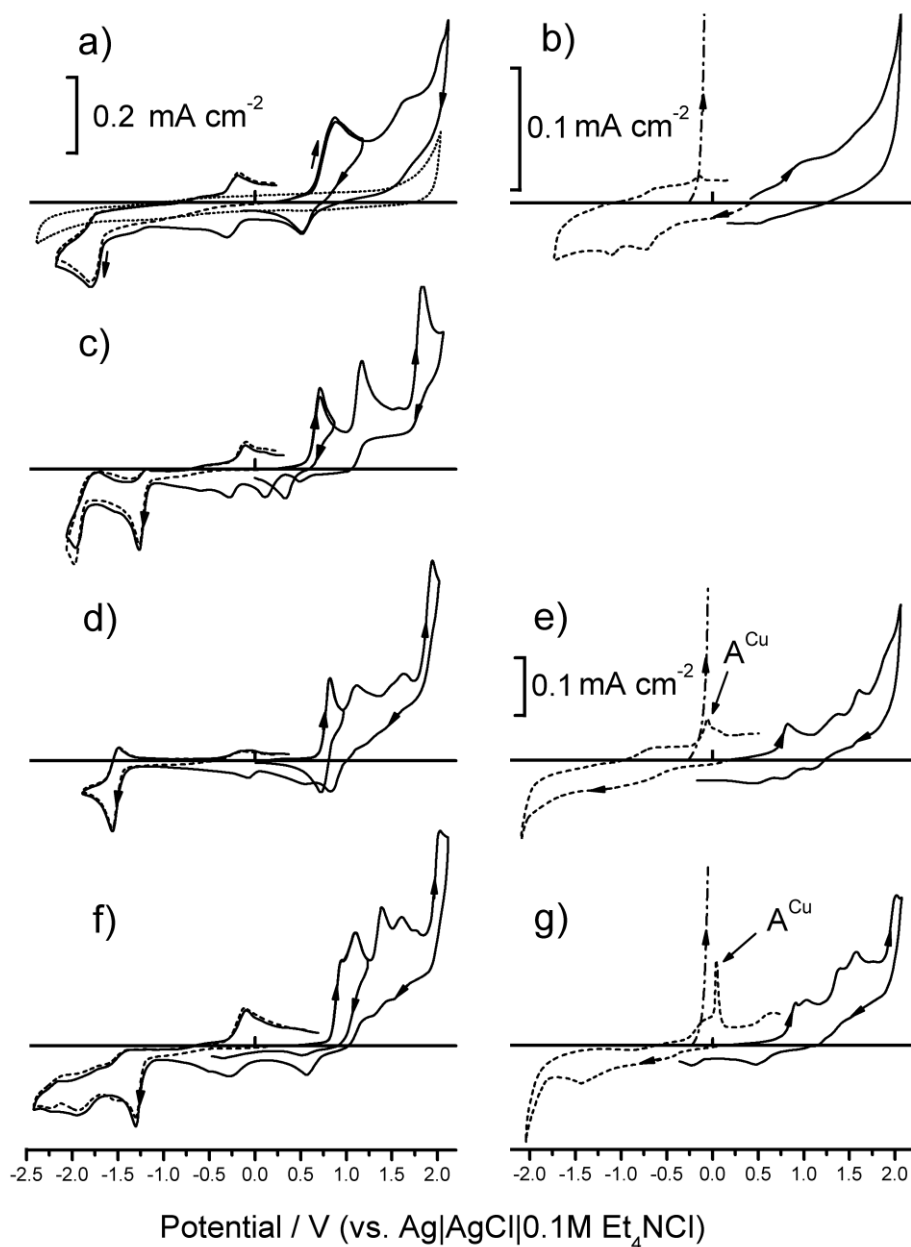

**Figure S18.** Voltammograms (50 mV/s) of the ligands **2** (a), **3** (c), **4** (d), **5** (f) ( $1.36 \text{ mmol}\cdot\text{l}^{-1}$ ) and their complexes **2a** (b), **4a** (e), **5a** (g) ( $0.7 \text{ mmol}\cdot\text{l}^{-1}$ ) upon anodic polarization (*solid line*), cathodic polarization (*dashed line*) in  $0.1 \text{ mol}\cdot\text{l}^{-1}$   $(\text{C}_2\text{H}_5)_4\text{NClO}_4$  acetonitrile solution on glassy-carbon electrode and background cyclic voltammogram of glassy-carbon electrode (*dotted line*), anodic voltammogram of copper electrode (*dashed-dotted line*). \*For the complexes **2a** and **4a** the concentrations are approximately  $0.15 \text{ mM}$  and  $0.3\text{-}0.4 \text{ mM}$ , respectively, due to their low solubility.

## Protein binding studies

The formula used for the plotting and analysis of protein binding data [2]:

$$\frac{F_0 - F}{F_0 - F_s} = \frac{[P] + [Q] + K_d - \sqrt{([P] + [Q] + K_d)^2 - 4[P][Q]}}{2[P]}$$



## Albumin binding studies

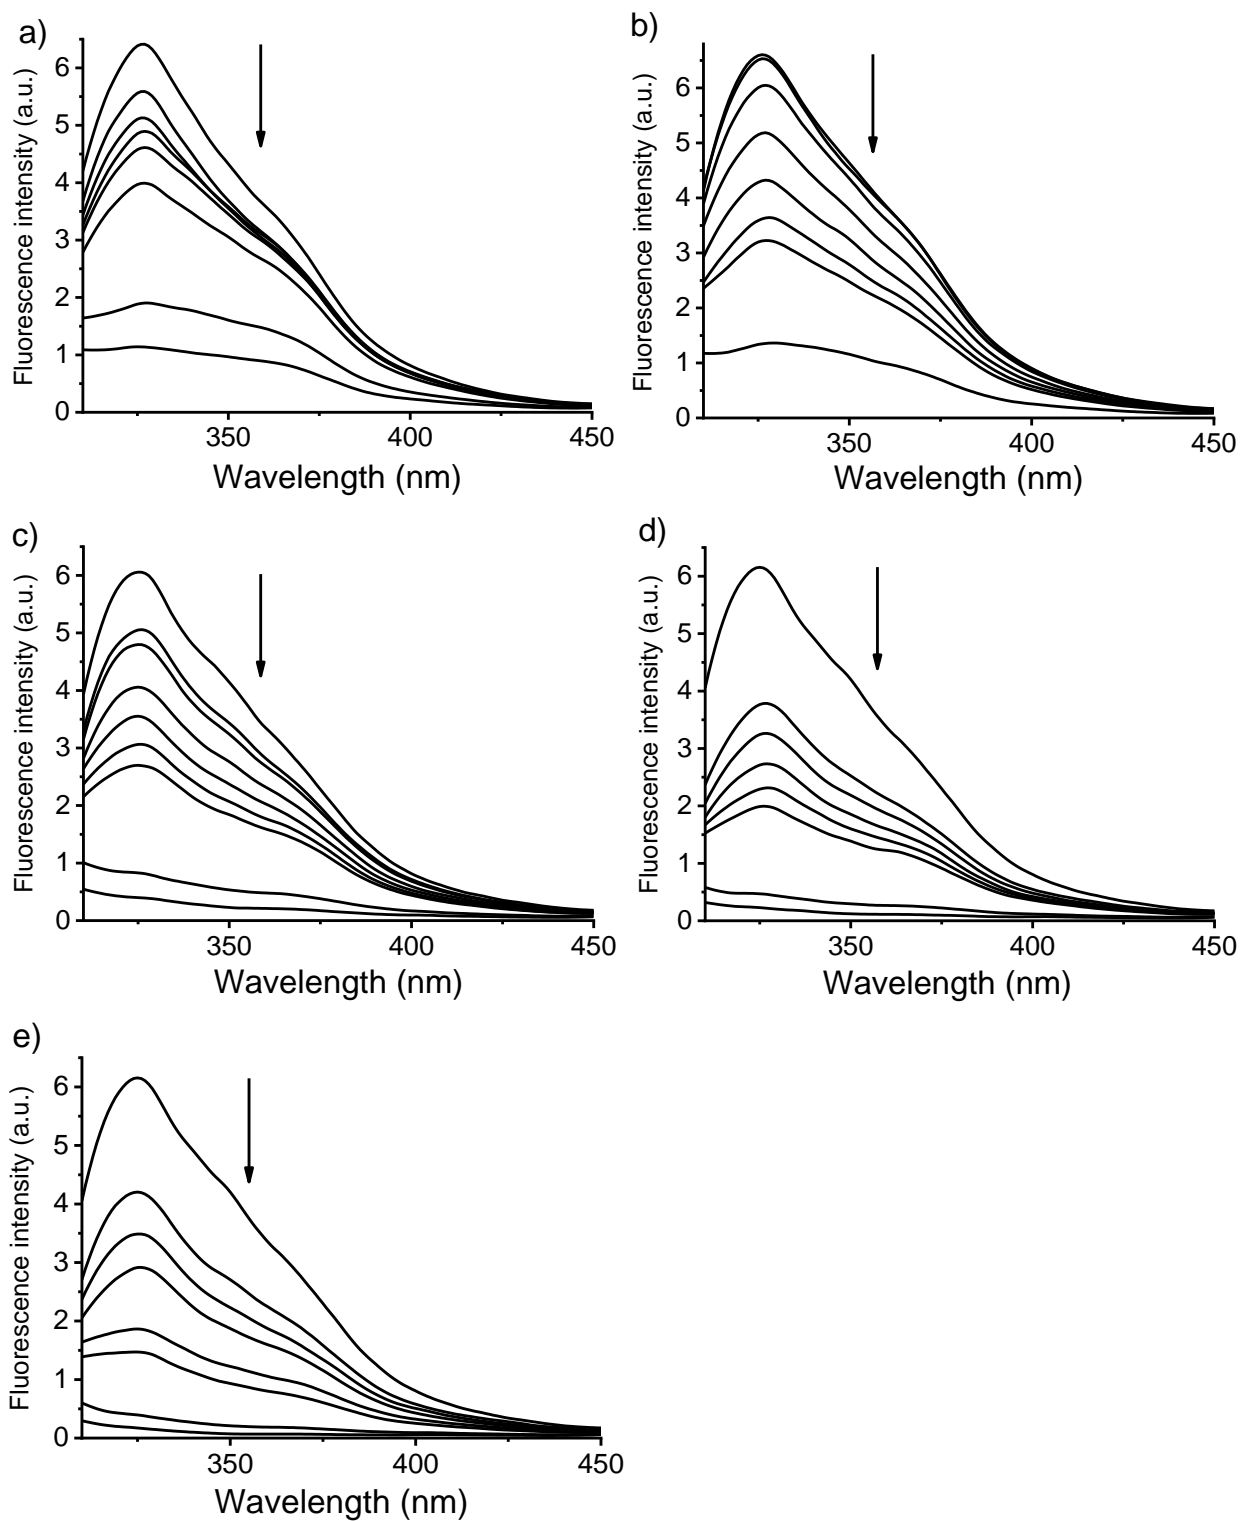

**Figure S19.** Albumin fluorescence quenching spectra of the Cu(II) complexes **1a** (a), **2a** (b), **4a** (c), **5a** (d), **6a** (e).

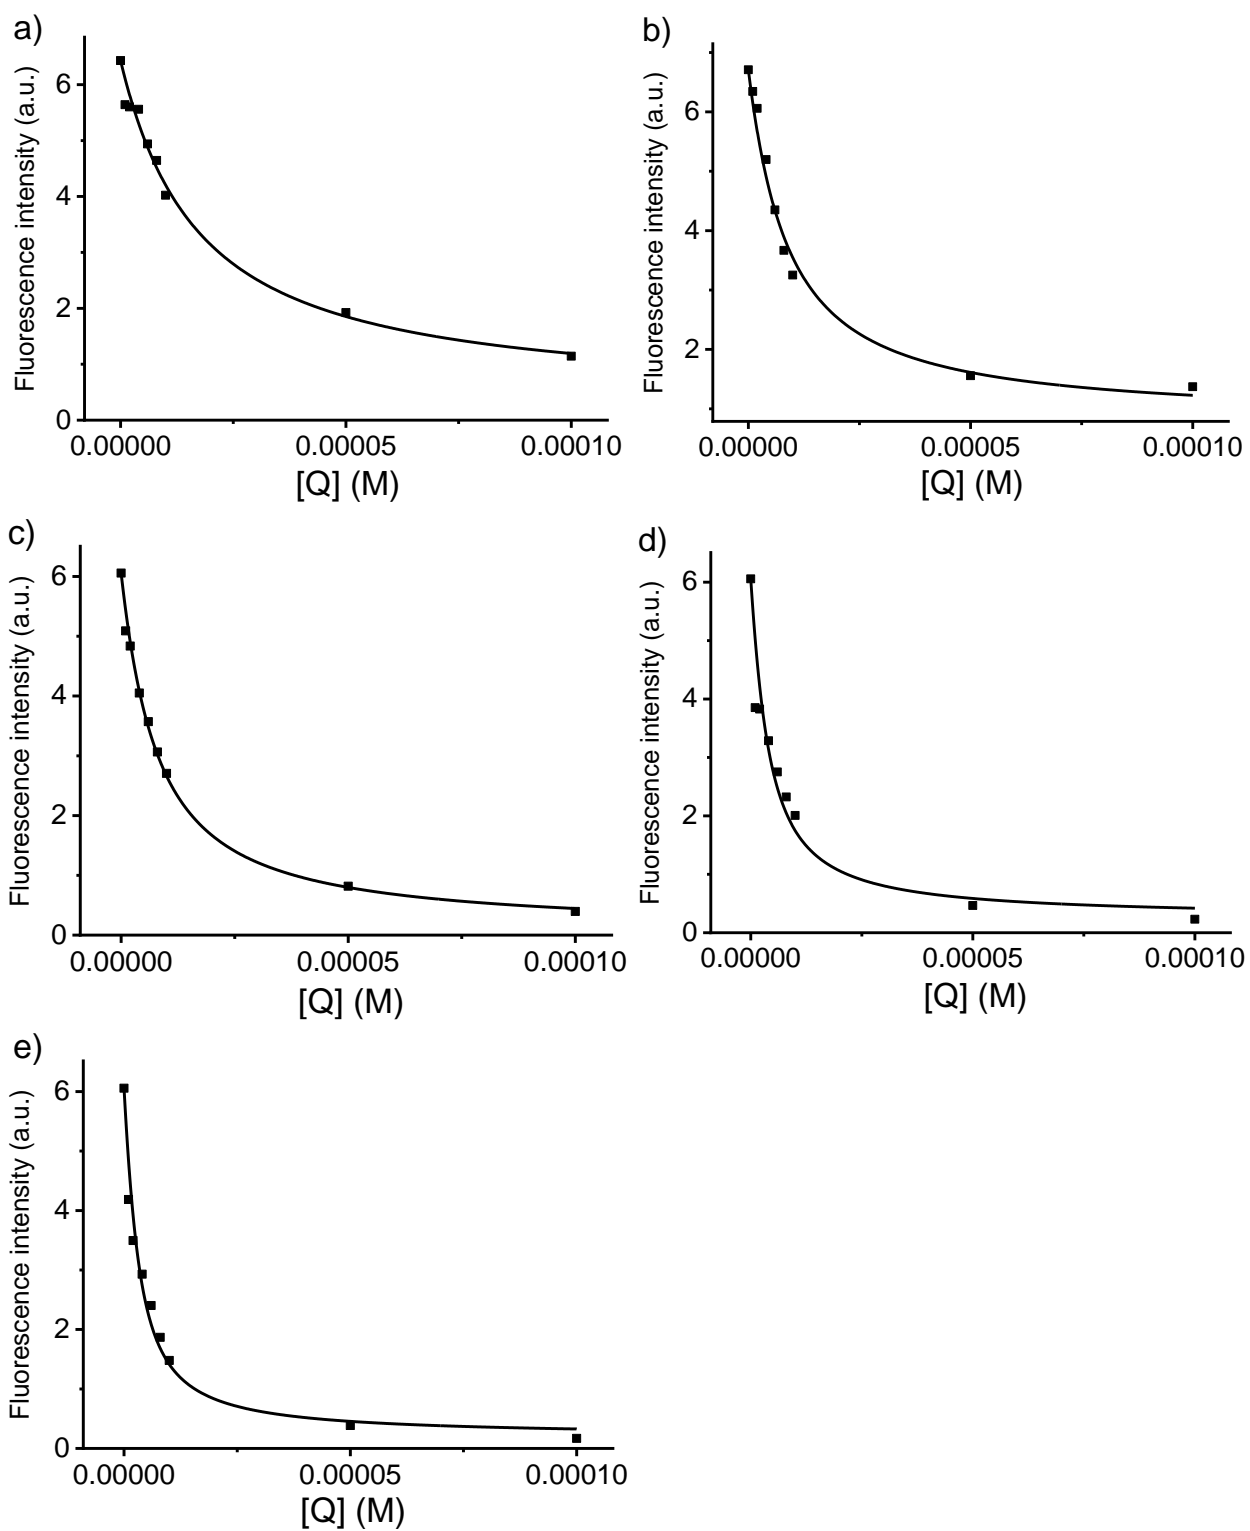

**Figure S20.** Non-linear regression analysis for albumin fluorescence quenching of the Cu(II) complexes **1a** (a,  $R^2 = 0.98268$ ), **2a** (b,  $R^2 = 0.98433$ ), **4a** (c,  $R^2 = 0.99446$ ), **5a** (d,  $R^2 = 0.91987$ ), **6a** (e,  $R^2 = 0.96730$ ).

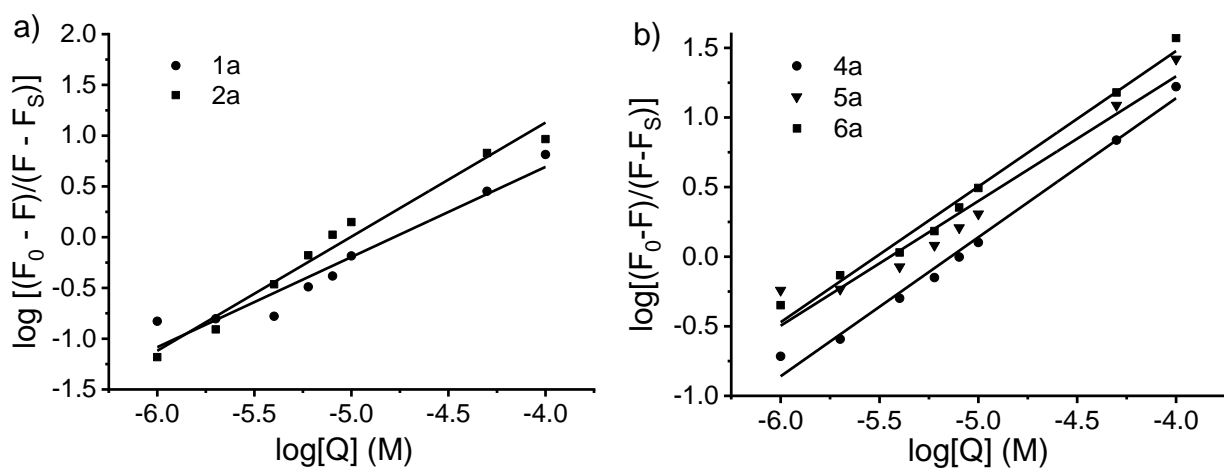

**Figure S21.** The Hill plots for albumin fluorescence quenching of the Cu(II) complexes **1a** ( $R^2 = 0.93154$ ), **2a** ( $R^2 = 0.97388$ ) (a); **4a** ( $R^2 = 0.98584$ ), **5a** ( $R^2 = 0.94190$ ), **6a** ( $R^2 = 0.98187$ ) (b).

### Hemoglobin binding studies

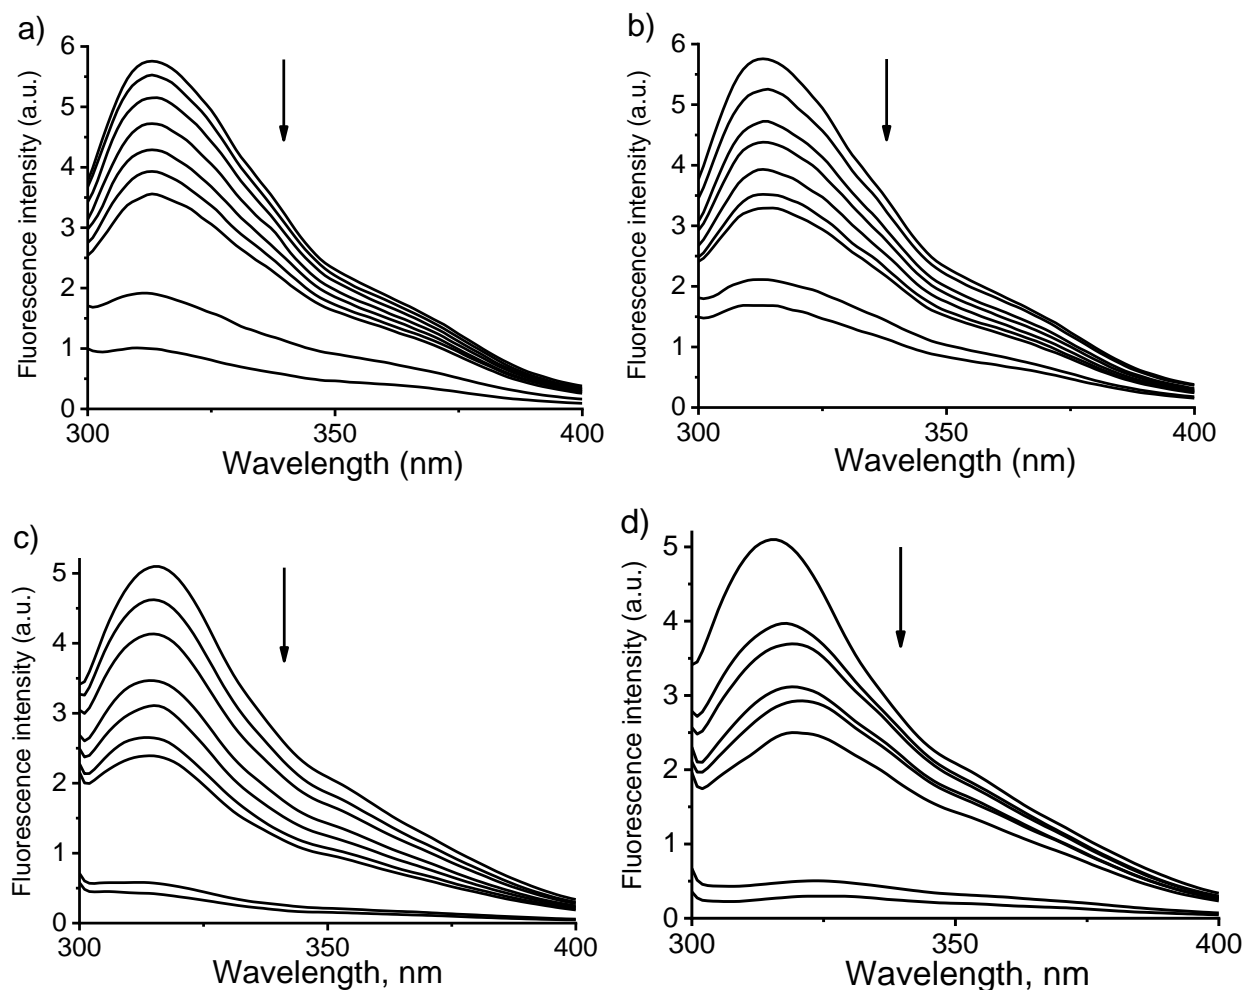

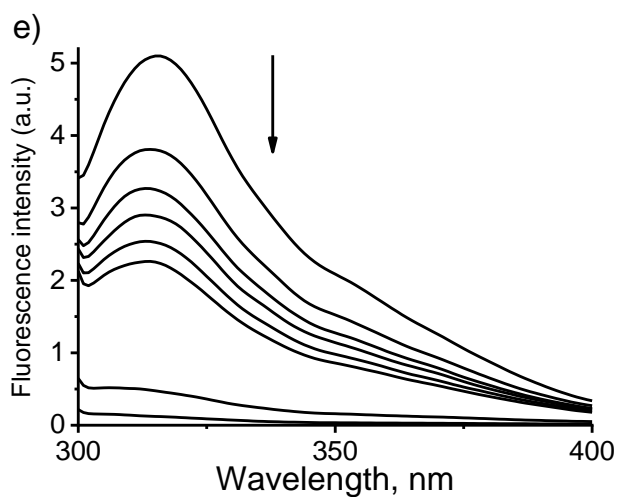

**Figure S22.** Hemoglobin fluorescence quenching spectra of the Cu(II) complexes **1a** (a), **2a** (b), **4a** (c), **5a** (d), **6a** (e).

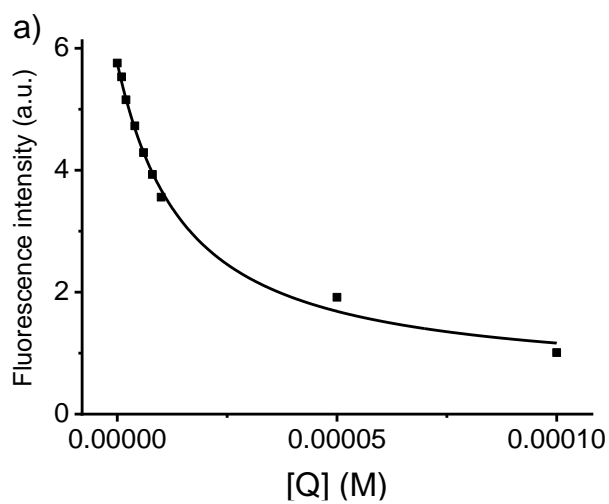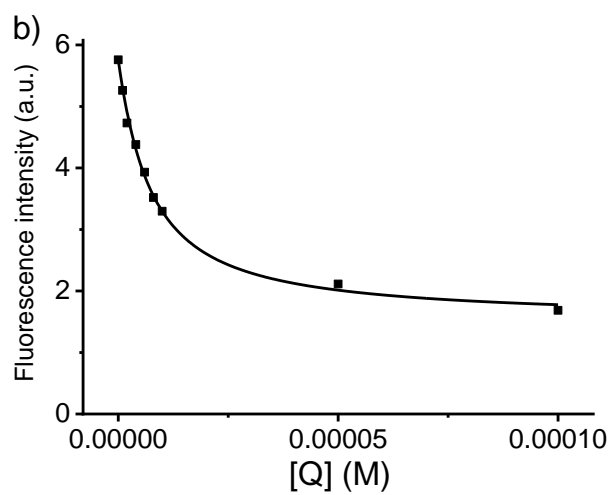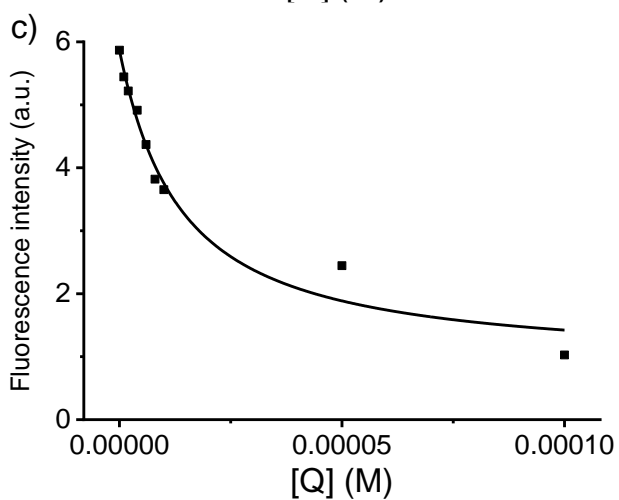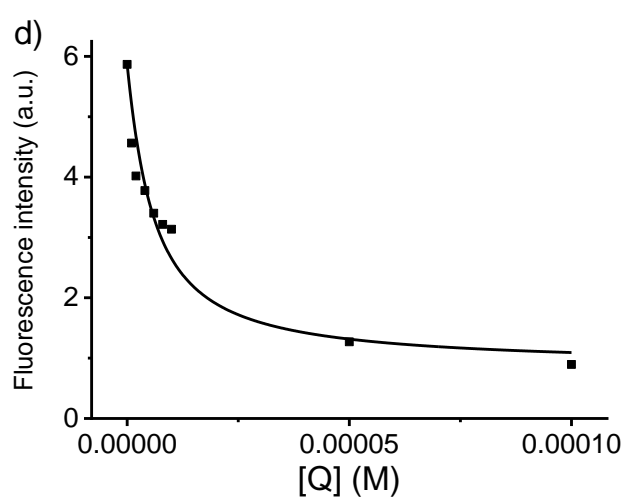

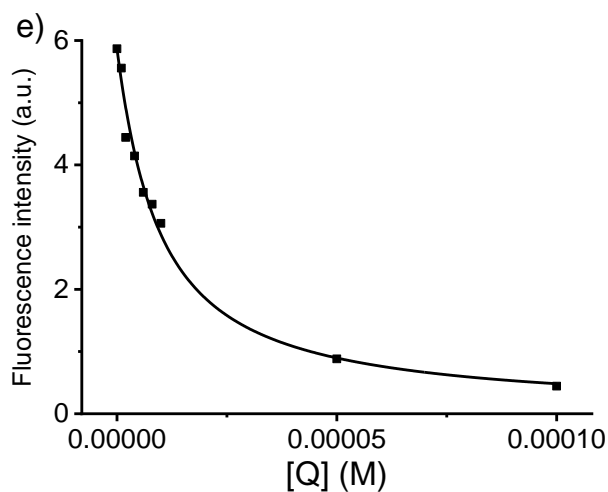

**Figure S23.** Non-linear regression analysis for hemoglobin fluorescence quenching of the Cu(II) complexes **1a** (a,  $R^2 = 0.99450$ ), **2a** (b,  $R^2 = 0.99535$ ), **4a** (c,  $R^2 = 0.96710$ ), **5a** (d,  $R^2 = R^2 = 0.92648$ ), **6a** (e,  $R^2 = 0.98623$ ).

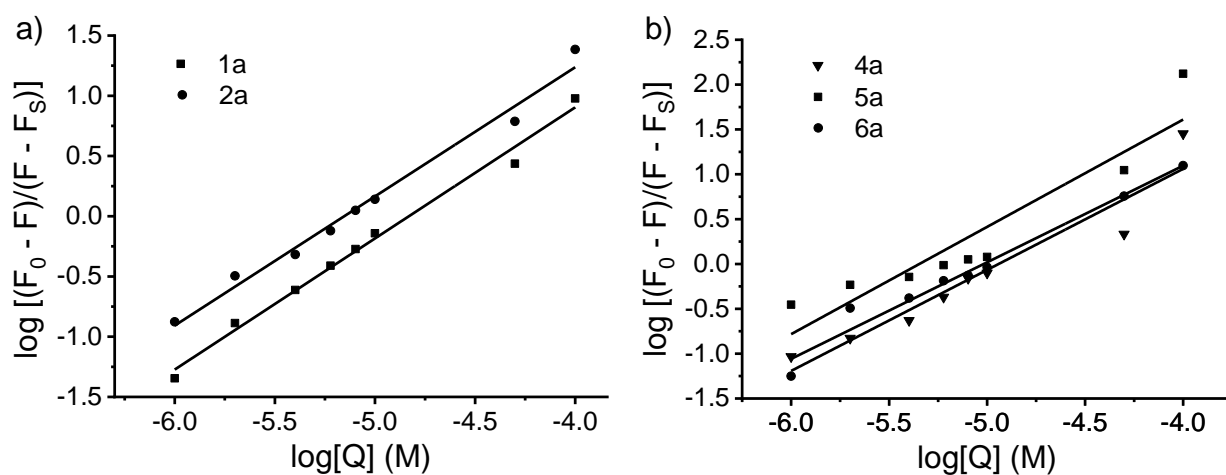

**Figure S24.** The Hill plots for hemoglobin fluorescence quenching of the Cu(II) complexes **1a** ( $R^2 = 0.98872$ ), **2a** ( $R^2 = 0.98304$ ) (a); **4a** ( $R^2 = 0.90603$ ), **5a** ( $R^2 = 0.85135$ ), **6a** ( $R^2 = 0.96794$ ) (b).

DFT calculations

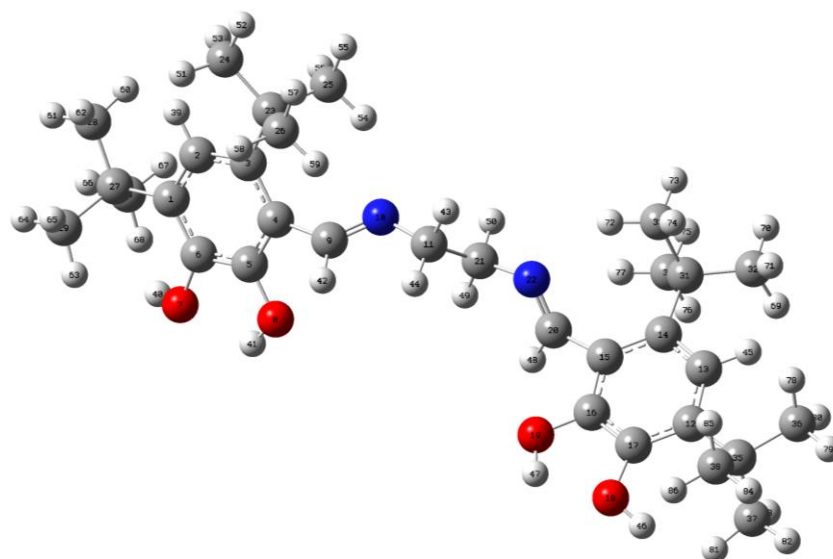

**Figure S25.** DFT-optimized structure of the ligand **1**.

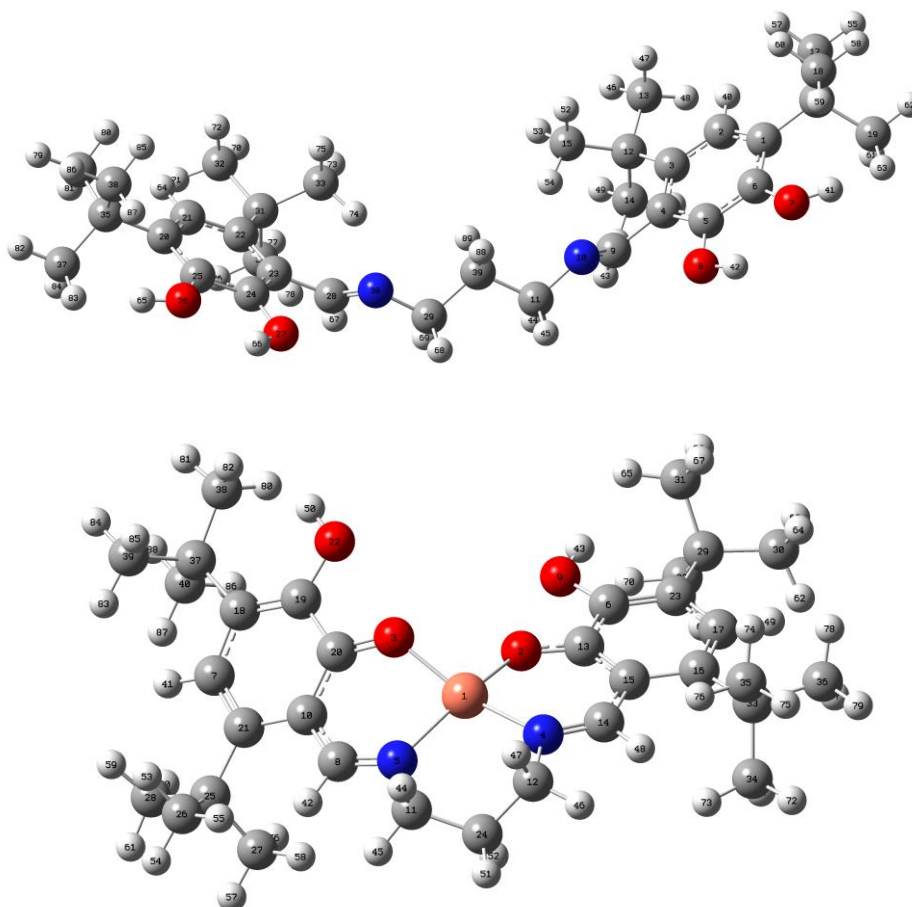

**Figure S26.** DFT-optimized structures of the ligand **2** and the complex **2a**.

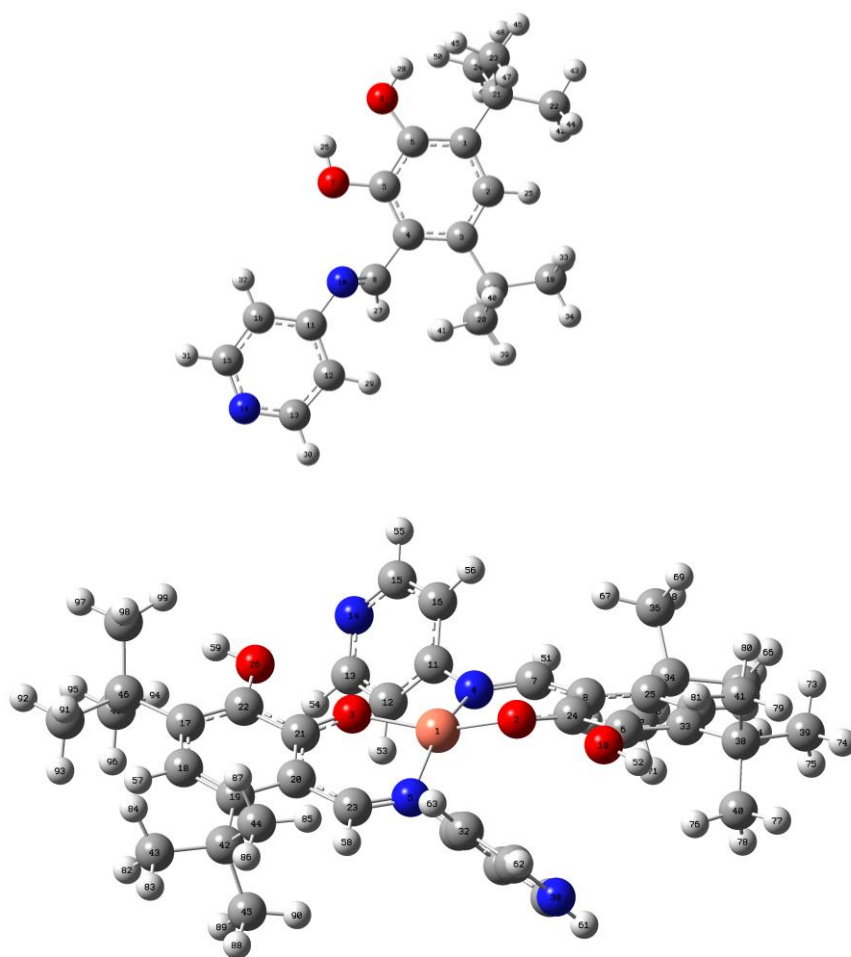

**Figure S27.** DFT-optimized structures of the ligand **3** and the complex **3a**.

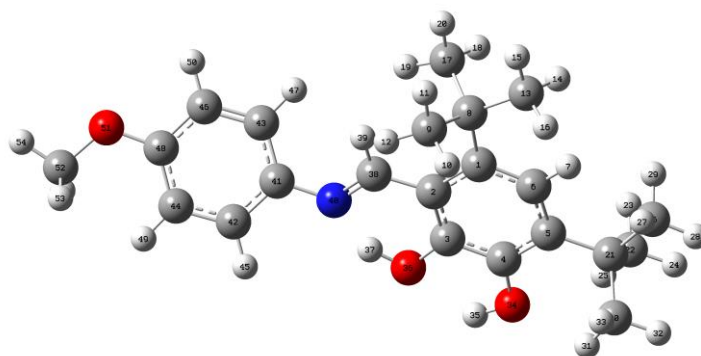

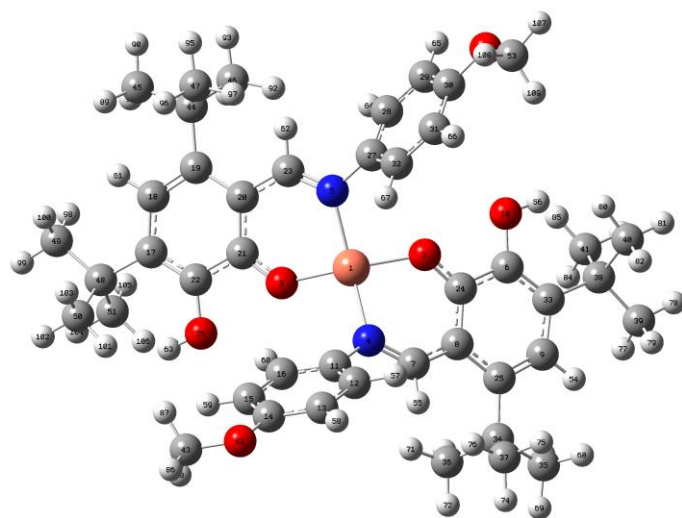

**Figure S28.** DFT-optimized structures of the ligand **4** and the complex **4a**.

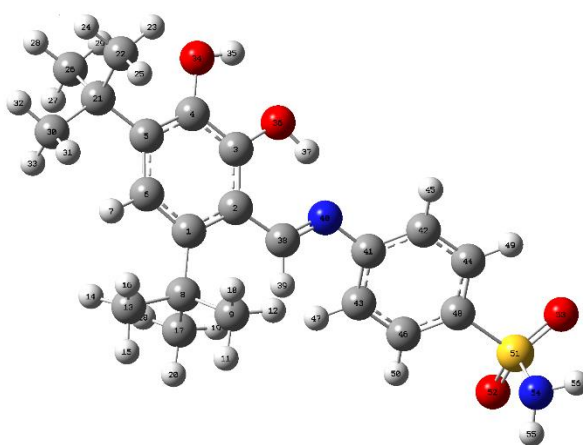

**Figure S29.** DFT-optimized structure of the ligand **5**.

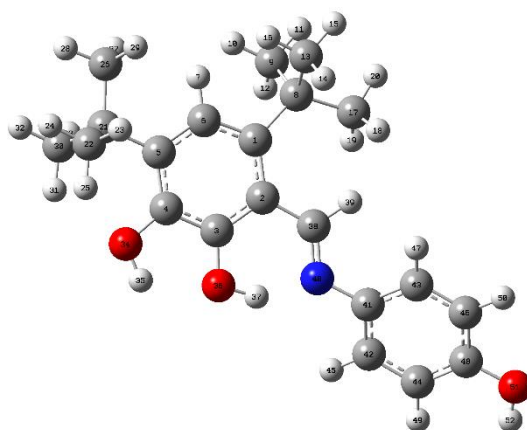



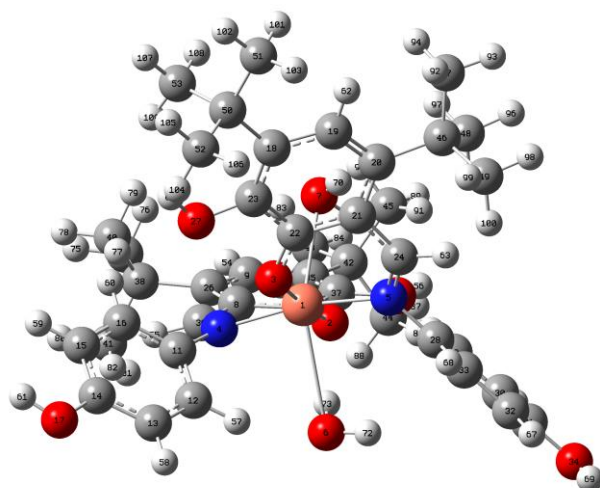

**Figure S30.** DFT-optimized structure of the ligand **6** and the complex **6a**.

**Table S3.** Prominent IR absorption bands ( $\nu$ ,  $\text{cm}^{-1}$ ) of the ligands and their Cu(II) complexes.

| Compound  |        | $\nu(\text{N-H})$ | $\nu(\text{O-H})$       | $\nu(\text{C=N})$ | $\nu(\text{C}_{\text{arom}}-\text{N})$ | $\nu(\text{C-O})$       | $\nu(\text{Cu-O})$ | $\nu(\text{Cu-N})$ |
|-----------|--------|-------------------|-------------------------|-------------------|----------------------------------------|-------------------------|--------------------|--------------------|
| <b>1</b>  | Exp.   | –                 | 3398s                   | 1613s             | 1243m<br>1221m                         | 1196m<br>1132m          | –                  | –                  |
|           | Calcd. | –                 | 3716                    | 1659              | 1246<br>1212                           | 1186<br>1124            | –                  | –                  |
| <b>1a</b> | Exp.   | –                 | 3314s                   | 1618s             | 1289m<br>1234m                         | 1192m<br>1103m          | 623m               | 463w               |
|           | Calcd. | –                 | 3355                    | 1599              | 1306<br>1220                           | 1207<br>1082            | 601                | 488                |
| <b>2</b>  | Exp.   | –                 | 3498s<br>3368s          | 1615s             | 1243m<br>1219m                         | 1198m<br>1114m          | –                  | –                  |
|           | Calcd. | –                 | 3715<br>3626            | 1656              | 1269<br>1229                           | 1189<br>1123            | –                  | –                  |
| <b>2a</b> | Exp.   | –                 | 3502s<br>3308s          | 1595s             | 1305m<br>1233m                         | 1164m<br>1110m          | 619m               | 470w               |
|           | Calcd. | –                 | 3663<br>3640            | 1584              | 1311<br>1235                           | 1145<br>1064            | 591                | 474                |
| <b>3</b>  | Exp.   | –                 | 3100s                   | 1583s             | 1230m<br>1205m                         | 1169m<br>1073m          | –                  | –                  |
|           | Calcd. | –                 | 3621                    | 1638              | 1223<br>1218                           | 1190<br>1016            | –                  | –                  |
| <b>3a</b> | Exp.   | –                 | 3375s                   | 1578s             | 1248m<br>1228m                         | 1165m<br>1086m          | 601m               | 488w               |
|           | Calcd. | –                 | 3639<br>3631            | 1576              | 1254<br>1215                           | 1140<br>1054            | 610                | 468                |
| <b>4</b>  | Exp.   | –                 | 3365s<br>3343s          | 1590s             | 1220m                                  | 1189m<br>1111m          | –                  | –                  |
|           | Calcd. | –                 | 3595                    | 1592              | 1228                                   | 1188<br>1149            | –                  | –                  |
| <b>4a</b> | Exp.   | –                 | 3342s                   | 1587s             | 1262m<br>1241m                         | 1166m<br>1090m          | 618m               | 488w               |
|           | Calcd. | –                 | 3637                    | 1591              | 1253<br>1210                           | 1138<br>1052            | 593                | 438                |
| <b>5</b>  | Exp.   | 3415s<br>3375s    | 3279s                   | 1585s             | 1250m<br>1223m                         | 1161m<br>1097m          | –                  | –                  |
|           | Calcd. | 3483<br>3380      | 3600                    | 1583              | 1260<br>1224                           | 1184<br>1147            | –                  | –                  |
| <b>5a</b> | Exp.   | 3401s<br>3351s    | 3270s                   | 1579s             | 1263m<br>1227m                         | 1158m<br>1090m          | 618m               | 488w               |
|           | Calcd. | 3423<br>3320      | 3635                    | 1552              | 1266<br>1210                           | 1135<br>1053            | 588                | 490                |
| <b>6</b>  | Exp.   | –                 | 3339s<br>3255s<br>3171s | 1619s<br>1606s    | 1242m<br>1222m                         | 1161m<br>1108m<br>1039m | –                  | –                  |

|           |        |   |                      |       |                |                      |      |      |
|-----------|--------|---|----------------------|-------|----------------|----------------------|------|------|
|           | Calcd. | – | 3693<br>3592<br>2773 | 1593  | 1237<br>1224   | 1181<br>1148<br>1051 | –    | –    |
| <b>6a</b> | Exp.   | – | 3392s                | 1585s | 1259m<br>1225m | 1165m<br>1090m       | 622m | 482w |
|           | Calcd. | – | 3639                 | 1575  | 1253<br>1211   | 1135<br>1049         | 588  | 473  |

**Table S4.** DFT-calculated parameters for the Cu(II) complexes.

| Computed Parameter   | Compound  |           |           |           |           |           |
|----------------------|-----------|-----------|-----------|-----------|-----------|-----------|
|                      | <b>1a</b> | <b>2a</b> | <b>3a</b> | <b>4a</b> | <b>5a</b> | <b>6a</b> |
| Dipole moment (D)    | 7.578     | 2.359     | 1.044     | 1.196     | 6.901     | 3.837     |
| MO energy (kcal/mol) |           |           |           |           |           |           |
| HOMO                 | -115.24   | -107.33   | -116.08   | -107.59   | -119.16   | -111.06   |
| LUMO                 | -38.21    | -26.36    | -38.20    | -29.73    | -40.27    | -31.13    |
| $\Delta E$           | 77.03     | 80.97     | 77.88     | 77.86     | 78.89     | 79.93     |
| Bond length (Å)      |           |           |           |           |           |           |
| Cu(1)–O(2)           | 1.912     | 1.917     | 1.903     | 1.913     | 1.906     | 1.957     |
| Cu(1)–O(3)           | 1.912     | 1.921     | 1.906     | 1.917     | 1.905     | 1.926     |
| Cu(1)–N(4)           | 1.967     | 1.997     | 2.033     | 2.025     | 2.032     | 2.035     |
| Cu(1)–N(5)           | 1.967     | 2.013     | 2.013     | 2.017     | 2.029     | 2.084     |
| Cu(1)–O(6)           | -         | -         | -         | -         | -         | 2.904     |
| Cu(1)–O(7)           | -         | -         | -         | -         | -         | 2.600     |
| Bond angles (°)      |           |           |           |           |           |           |
| N(4)–Cu(1)–O(2)      | -         | 89.7      | 88.7      | 88.9      | 89.2      | 86.4      |
| N(4)–Cu(1)–O(3)      | 90.2      | -         | 96.3      | 97.5      | 96.5      | 92.7      |
| O(3)–Cu(1)–N(5)      | -         | 87.7      | 89.7      | 89.7      | 89.3      | 86.2      |
| N(5)–Cu(1)–O(2)      | 90.2      | -         | 93.2      | 94.0      | 96.5      | 95.9      |
| O(2)–Cu(1)–O(3)      | 95.1      | 90.9      | -         | -         | -         | -         |
| N(4)–Cu(1)–N(5)      | 84.9      | 98.6      | -         | -         | -         | -         |
| N(4)–Cu(1)–O(6)      | -         | -         | -         | -         | -         | 82.3      |
| N(4)–Cu(1)–O(7)      | -         | -         | -         | -         | -         | 105.3     |
| N(5)–Cu(1)–O(6)      | -         | -         | -         | -         | -         | 88.2      |
| N(5)–Cu(1)–O(7)      | -         | -         | -         | -         | -         | 86.1      |

|                 |   |   |   |   |   |       |
|-----------------|---|---|---|---|---|-------|
| O(2)–Cu(1)–O(6) | - | - | - | - | - | 68.0  |
| O(2)–Cu(1)–O(7) | - | - | - | - | - | 80.3  |
| O(3)–Cu(1)–O(6) | - | - | - | - | - | 118.0 |
| O(3)–Cu(1)–O(7) | - | - | - | - | - | 94.0  |

## Molecular docking studies

**Table S5.** Binding energies and amino acid surroundings of the Cu(II) complexes upon protein binding.

| Compound       | $E_{\text{bind}}$ , kcal/mol | AA surrounding within 4 Å                                                                                                                                     |
|----------------|------------------------------|---------------------------------------------------------------------------------------------------------------------------------------------------------------|
| PDB code: 6ick |                              |                                                                                                                                                               |
| <b>4a</b>      | -8.4                         | LYS(239), PHE(281), ASN(187), THR(181), VAL(237), ASP(184), TYR(240), LEU(182), PHE(174), HIS(278), PHE(171), PHE(223), GLY(180)                              |
| PDB code: 2f00 |                              |                                                                                                                                                               |
| <b>5a</b>      | -8.1                         | ARG(10), LEU(39), ARG(117), VAL(13), ILE(22), PRO(104), SER(80), ARG(17), VAL(19), GLU(15), GLU(42), ARG(119), GLU(114), PHE(118), TYR(44), PRO(14), LEU(115) |
| PDB code: 4jk4 |                              |                                                                                                                                                               |
| <b>5a (1)</b>  | -7.4                         | LYS(131), GLU(16), LYS(51), PHE(36), LYS(132), ASP(129), GLY(135), ASP(37), TRP(134), VAL(40), GLU(17), LYS(20), ASN(44), LYS(41), GLU(48), LEU(24)           |
| <b>5a (2)</b>  | -7.1                         | ASP(124), LYS(136), TYR(137), PRO(35), GLU(140), PHE(36), ASP(118), ALA(128), GLU(125), ASP(37), TYR(160), ARG(143), LEU(115), TYR(139), THR(121)             |
| <b>5a (3)</b>  | -7.1                         | LYS(294), ARG(194), THR(190), LYS(187), ASP(450), GLU(293), VAL(292), GLU(186), GLU(291), SER(191), GLU(443), ARG(435), TYR(156)                              |
| <b>4a (1)</b>  | -7.8                         | GLU(478), PHE(205), GLY(206), ARG(208), LYS(350), LYS(204), ALA(209), LEU(480), LEU(346), GLU(353), SER(479), VAL(481), THR(477), GLU(357)                    |
| <b>4a (2)</b>  | -7.1                         | VAL(228), PHE(227), ARG(208), THR(231), ALA(321), GLU(320), VAL(234), ALA(324), ASP(323), THR(235), LYS(211), VAL(215)                                        |
| <b>4a (3)</b>  | -7.0                         | LEU(115), LYS(136), ARG(185), ILE(181), PRO(113), LYS(116), GLU(140), TYR(137), LEU(122), PHE(133), GLU(125), TYR(160), PRO(117), ARG(143), ASP(118)          |
| PDB code: 6ihx |                              |                                                                                                                                                               |

|           |      |                                                                                                                |
|-----------|------|----------------------------------------------------------------------------------------------------------------|
| <b>5a</b> | -6.8 | TYR(140), PRO(95), VAL(93), THR(134), SER(138), ASP(94),<br>THR(137), LYS(99), ARG(92), SER(133)               |
| <b>6a</b> | -6.6 | SER(81), LEU(83), ALA(79), LYS(68), GLU(82), LYS(61), LEU(80),<br>THR(67), HEM(201), GLU(71), ALA(64), ALA(65) |

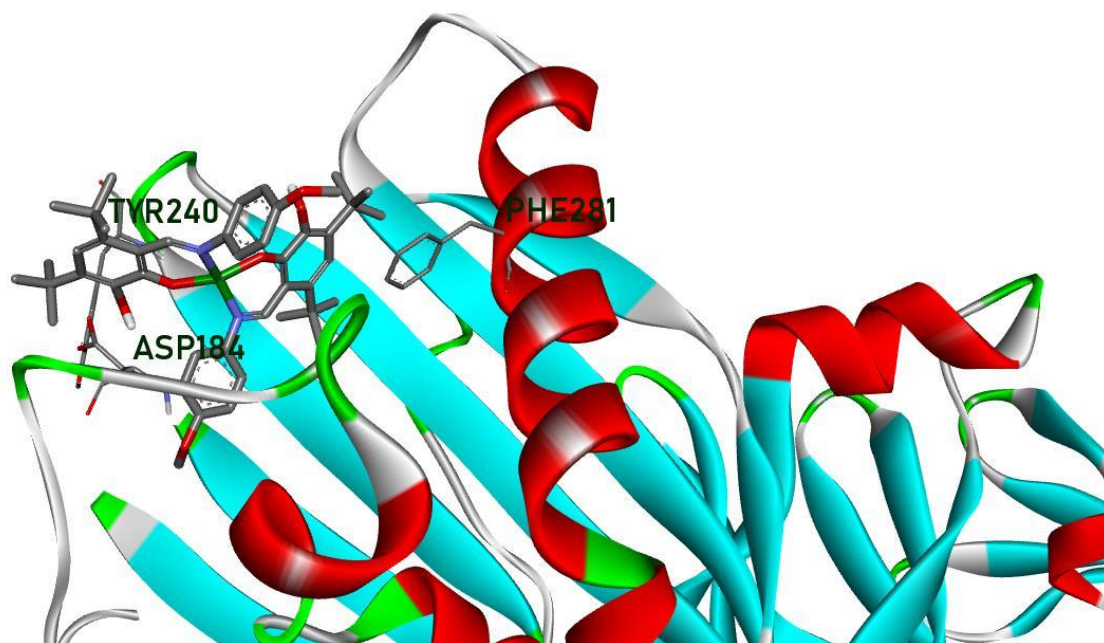

**Figure S31.** Interaction of the compound **4a** with metal binding protein (PDB code: 6ick).

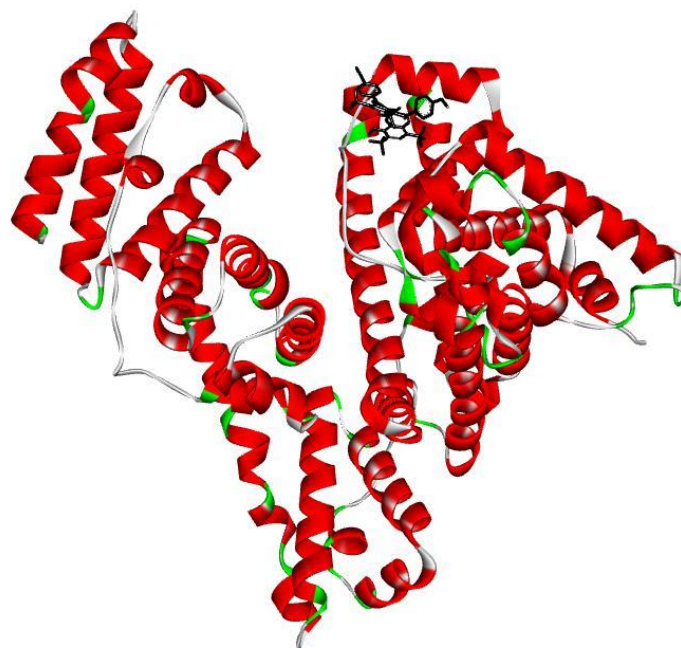

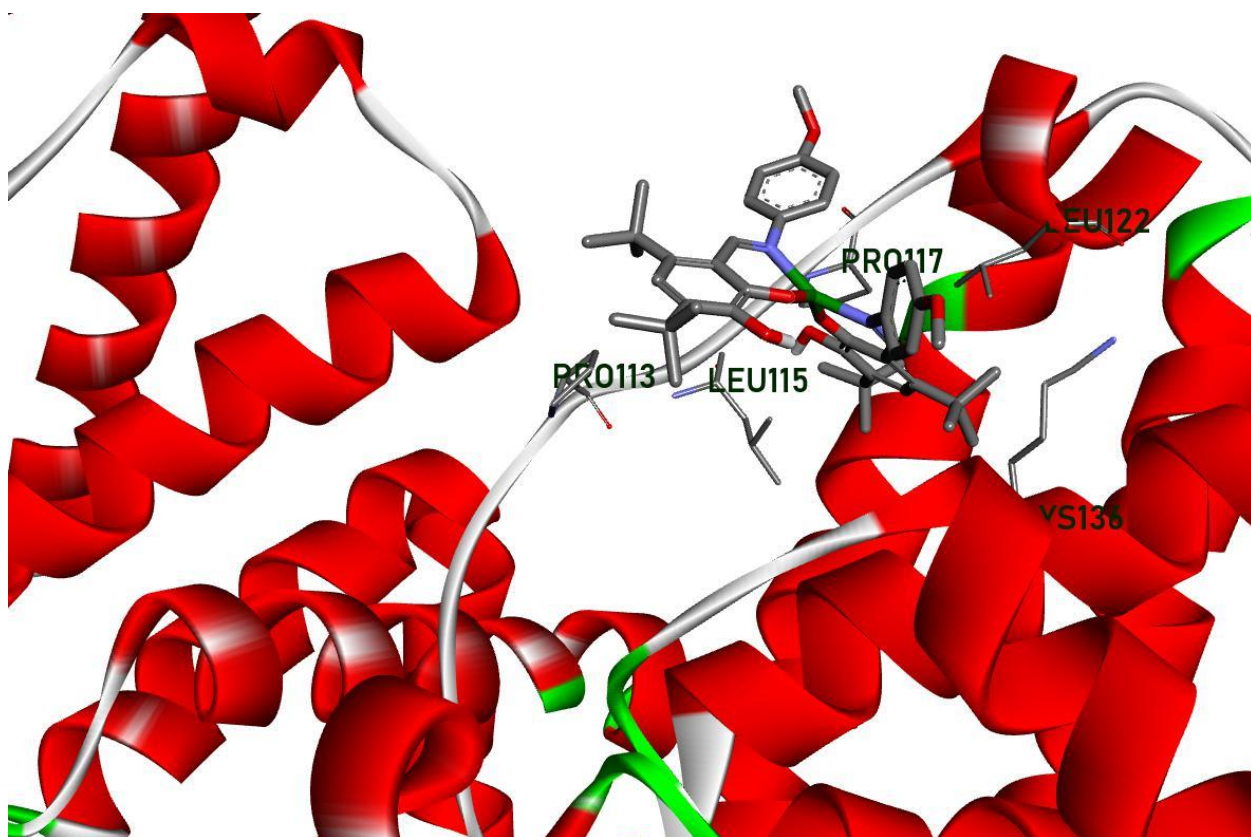

**Figure S32.** Interaction of the compound 4a (3) with bovine serum albumin (PDB code: 4jk4).

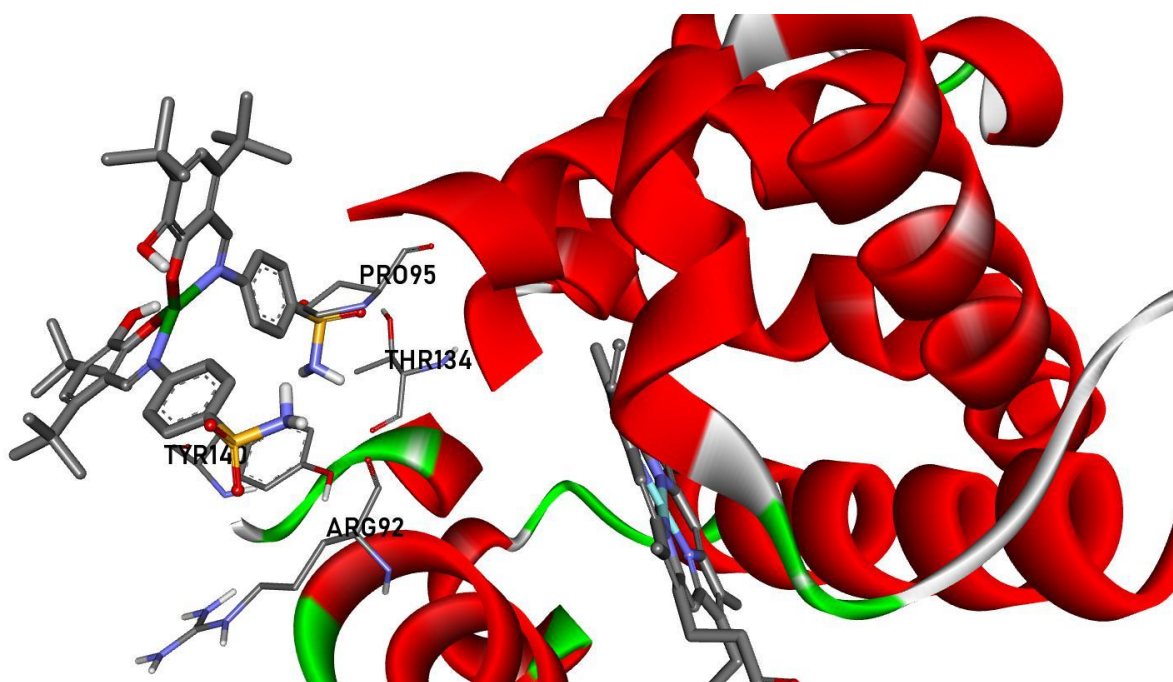

**Figure S33.** Interaction of the compound 5a (3) with bovine hemoglobin (PDB code: 6ihx).

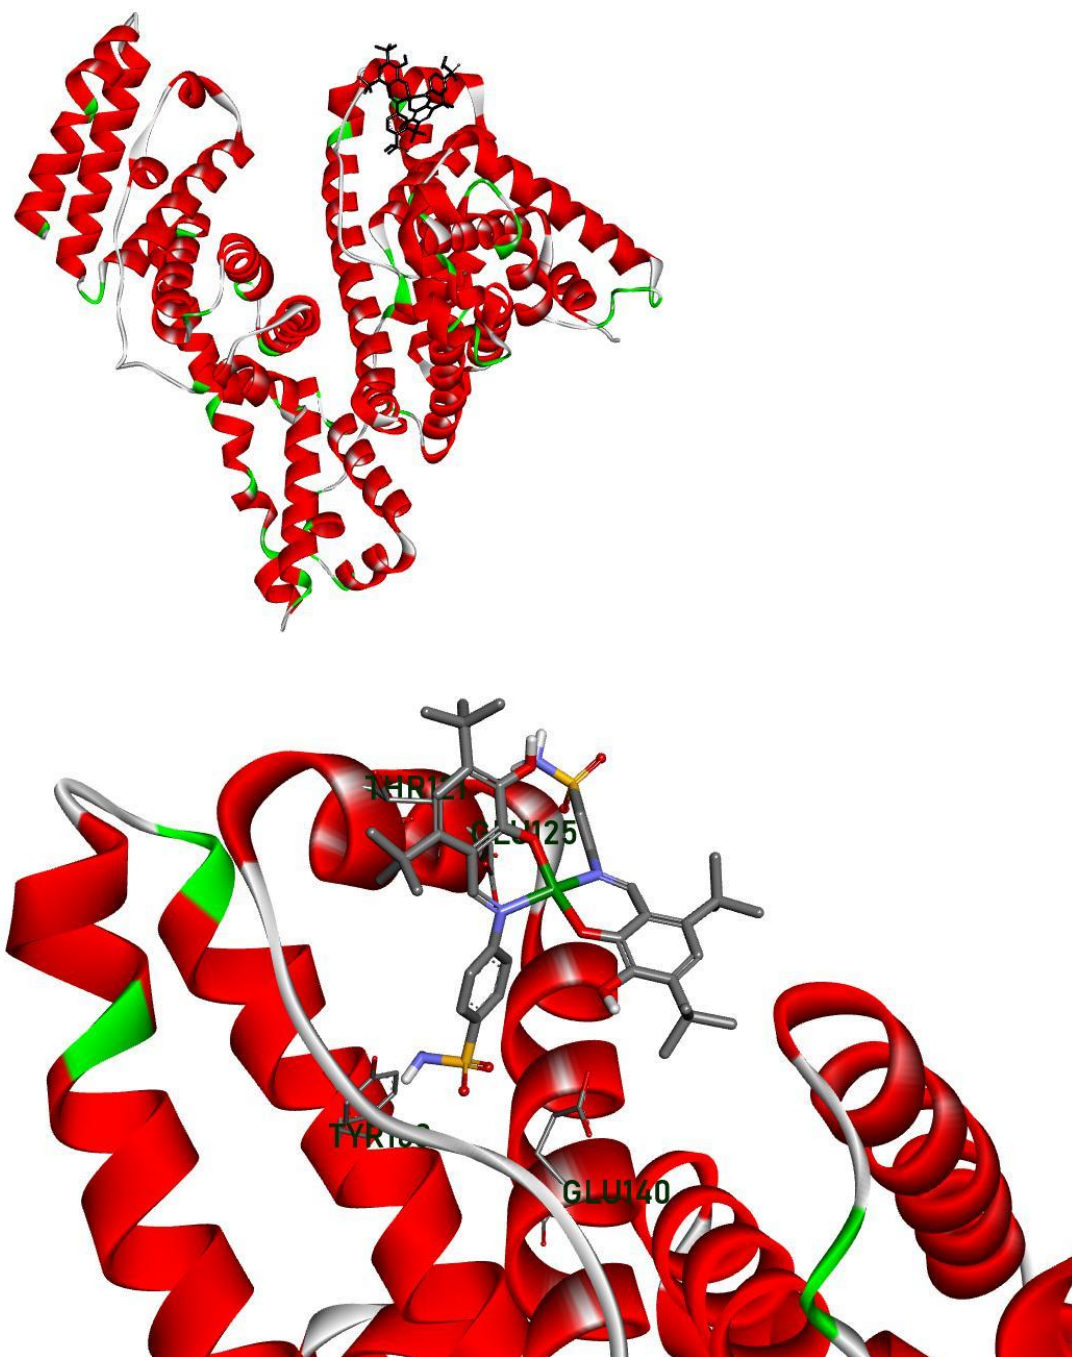

**Figure S34.** Interaction of the compound **5a** (**2**) with bovine serum albumin (PDB code: 4jk4).

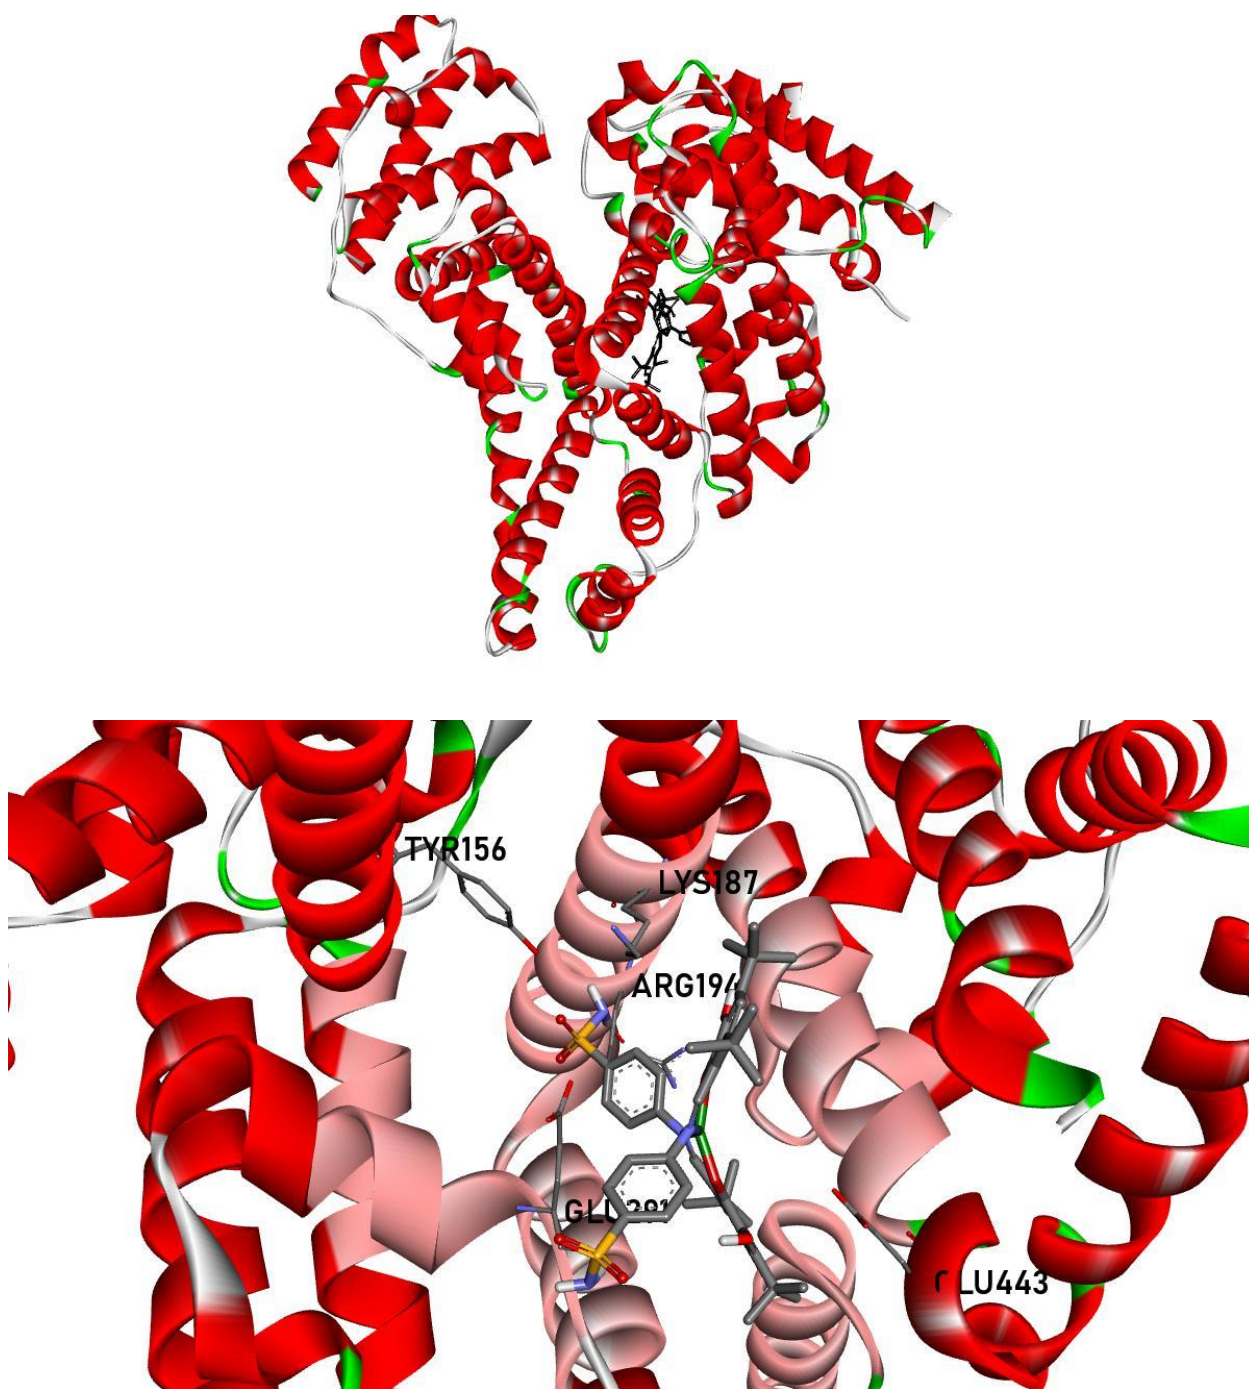

**Figure S35.** Interaction of the compound **5a** (3) with bovine serum albumin (PDB code: 4jk4).



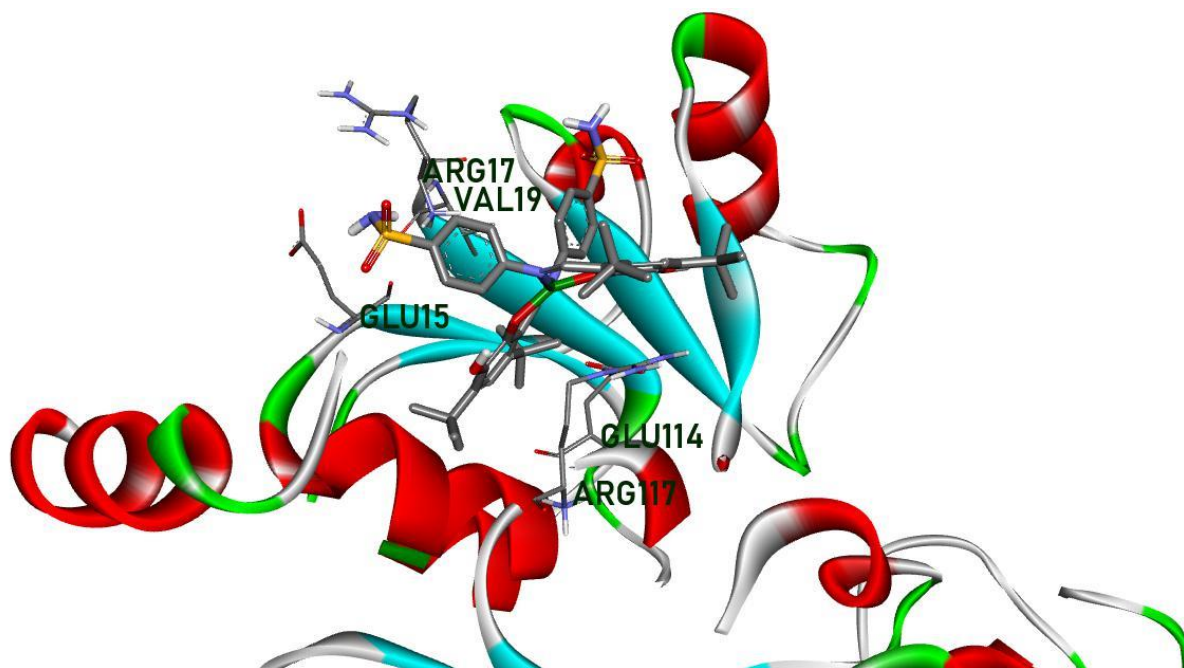

**Figure S36.** Interaction of the compound **5a** with the MurC protein (PDB code: 2f00).

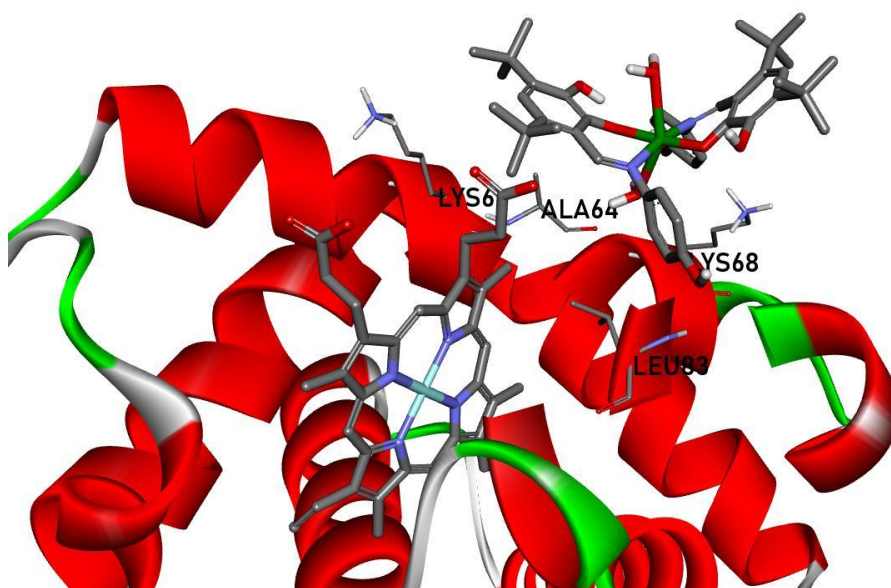

**Figure S37.** Interaction of the compound **6a** with bovine hemoglobin (PDB code: 6ihx).

**Table S6.** Experimental and calculated dissociation constants of the Cu(II) complexes for the compound-protein complexes with albumin and hemoglobin.

| Compound  | Albumin                         |                                 | Hemoglobin                      |                                 |
|-----------|---------------------------------|---------------------------------|---------------------------------|---------------------------------|
|           | $K_d$ experimental, $M^{-1}$    | $K_d$ calculated, $M^{-1}$ 298K | $K_d$ experimental, $M^{-1}$    | $K_d$ calculated, $M^{-1}$ 298K |
| <b>1a</b> | $(1.61 \pm 0.25) \cdot 10^{-5}$ | $1.90 \cdot 10^{-6}$            | $(1.39 \pm 0.12) \cdot 10^{-5}$ | $2.84 \cdot 10^{-5}$            |
| <b>2a</b> | $(7.76 \pm 1.06) \cdot 10^{-6}$ | $7.34 \cdot 10^{-6}$            | $(6.38 \pm 0.45) \cdot 10^{-6}$ | $2.02 \cdot 10^{-5}$            |

|           |                                 |                      |                                 |                      |
|-----------|---------------------------------|----------------------|---------------------------------|----------------------|
| <b>4a</b> | $(6.81 \pm 0.52) \cdot 10^{-6}$ | $6.20 \cdot 10^{-6}$ | $(7.68 \pm 0.33) \cdot 10^{-6}$ | $1.71 \cdot 10^{-5}$ |
| <b>5a</b> | $(2.96 \pm 0.89) \cdot 10^{-6}$ | $3.74 \cdot 10^{-6}$ | $(8.82 \pm 1.11) \cdot 10^{-6}$ | $1.03 \cdot 10^{-5}$ |
| <b>6a</b> | $(2.21 \pm 0.47) \cdot 10^{-6}$ | $3.74 \cdot 10^{-6}$ | $(6.67 \pm 0.79) \cdot 10^{-6}$ | $1.44 \cdot 10^{-5}$ |

## References

1. M.Y. Gvozdev, N.V. Loginova, G.A. Ksendzova, N.P. Osipovich, T.V. Koval'chuk-Rabchinskaya, Y.V. Faletrov, A.M. Khodosovskaya, A.N. Evtushenkov, *Medicinal Chemistry*, 2022.
2. D. Beckett, *Methods in Enzymology*, 2011, **488**.
